# Supplementary material for: Synergistic effects of CH3CO2H and Ca2+ on C–H bond activation by MnO4−
Source: Royal Society of Chemistry journal article supplement (doi:10.1039/d2sc03089f), 2022-01-01
Supplement: d2sc03089f1.pdf [file d2sc03089f1.pdf]

## Electronic Supplementary Information

### Synergistic effects of $\text{CH}_3\text{CO}_2\text{H}$ and $\text{Ca}^{2+}$ on C-H bond activation by $\text{MnO}_4^-$

Huatian Shi,<sup>†</sup> Lin Cheng,<sup>†</sup> Yi Pan, Chi-Keung Mak,\* Kai-Chung Lau\* and Tai-Chu Lau\*<sup>a</sup>

<sup>a</sup>Department of Chemistry, City University of Hong Kong, Tat Chee Avenue, Kowloon Tong, Hong Kong, China.

<sup>†</sup>These authors have equal contributions.

\*Correspondence: [bhtclau@cityu.edu.hk](mailto:bhtclau@cityu.edu.hk), [kaichung@cityu.edu.hk](mailto:kaichung@cityu.edu.hk), [chikmak6@cityu.edu.hk](mailto:chikmak6@cityu.edu.hk).

## Contents

|                                                                                                                                                                                                                                                                                                                                                                                                                                                                              |    |
|------------------------------------------------------------------------------------------------------------------------------------------------------------------------------------------------------------------------------------------------------------------------------------------------------------------------------------------------------------------------------------------------------------------------------------------------------------------------------|----|
| Experimental details .....                                                                                                                                                                                                                                                                                                                                                                                                                                                   | S1 |
| Materials .....                                                                                                                                                                                                                                                                                                                                                                                                                                                              | S1 |
| Instrumentations .....                                                                                                                                                                                                                                                                                                                                                                                                                                                       | S1 |
| Stoichiometric oxidation of cyclohexane by $\text{KMnO}_4$ .....                                                                                                                                                                                                                                                                                                                                                                                                             | S1 |
| (1) Stoichiometric oxidation of cyclohexane by $\text{KMnO}_4$ -AcOH in $\text{CH}_3\text{CN}$ .....                                                                                                                                                                                                                                                                                                                                                                         | S1 |
| (2) Stoichiometric oxidation of cyclohexane by $\text{KMnO}_4$ - $\text{Ca}(\text{OTf})_2$ in $\text{CH}_3\text{CN}$ .....                                                                                                                                                                                                                                                                                                                                                   | S1 |
| (3) Stoichiometric oxidation of cyclohexane by $\text{KMnO}_4$ - $\text{Ca}(\text{OTf})_2$ -AcOH in $\text{CH}_3\text{CN}$ .....                                                                                                                                                                                                                                                                                                                                             | S1 |
| Determination of KIE.....                                                                                                                                                                                                                                                                                                                                                                                                                                                    | S1 |
| (1) Stoichiometric oxidation of cyclohexane by $\text{KMnO}_4$ -AcOH in $\text{CH}_3\text{CN}$ .....                                                                                                                                                                                                                                                                                                                                                                         | S1 |
| (2) Stoichiometric oxidation of cyclohexane by $\text{KMnO}_4$ - $\text{Ca}(\text{OTf})_2$ in $\text{CH}_3\text{CN}$ .....                                                                                                                                                                                                                                                                                                                                                   | S2 |
| (3) Stoichiometric oxidation of cyclohexane by $\text{KMnO}_4$ - $\text{Ca}(\text{OTf})_2$ -AcOH in $\text{CH}_3\text{CN}$ .....                                                                                                                                                                                                                                                                                                                                             | S2 |
| Determination of the oxidation state of the manganese product dation .....                                                                                                                                                                                                                                                                                                                                                                                                   | S2 |
| (1) Oxidation of cyclohexane by $\text{KMnO}_4$ in the presence of $\text{Ca}(\text{OTf})_2$ and acetic acid in $\text{CH}_3\text{CN}$ ..                                                                                                                                                                                                                                                                                                                                    | S2 |
| (2) Oxidation of cyclohexane by $\text{KMnO}_4$ in the presence of $\text{Ca}(\text{OTf})_2$ in $\text{CH}_3\text{CN}$ .....                                                                                                                                                                                                                                                                                                                                                 | S2 |
| (3) Oxidation of cyclohexane by $\text{KMnO}_4$ in the presence of AcOH in $\text{CH}_3\text{CN}$ .....                                                                                                                                                                                                                                                                                                                                                                      | S2 |
| Stoichiometric oxidation of toluene by $\text{KMnO}_4$ - $\text{Ca}(\text{OTf})_2$ -AcOH in $\text{CH}_3\text{CN}$ .....                                                                                                                                                                                                                                                                                                                                                     | S2 |
| Analysis of manganese product (brown solid) .....                                                                                                                                                                                                                                                                                                                                                                                                                            | S2 |
| DFT Calculations. ....                                                                                                                                                                                                                                                                                                                                                                                                                                                       | S3 |
| References .....                                                                                                                                                                                                                                                                                                                                                                                                                                                             | S3 |
| Figures and Tables .....                                                                                                                                                                                                                                                                                                                                                                                                                                                     | S4 |
| Fig. S1 UV-Vis spectra of $\text{KMnO}_4$ in $\text{CH}_3\text{CN}$ , $\text{KMnO}_4$ and 3 M AcOH in $\text{CH}_3\text{CN}$ , and $\text{KMnO}_4$ , 3 M AcOH and 1 eq. $\text{Ca}(\text{OTf})_2$ in $\text{CH}_3\text{CN}$ . ....                                                                                                                                                                                                                                           | S4 |
| Fig. S2 Solution IR spectra ( $950\text{-}500\text{ cm}^{-1}$ ) of $\text{KMnO}_4$ (2.5 mM), $\text{Ca}(\text{OTf})_2$ (2.5 mM) and $\text{KMnO}_4$ + $\text{Ca}(\text{OTf})_2$ (2.5 mM) in $\text{CH}_3\text{CN}$ measured with a 1 mm KBr IR cell. The IR spectra show that upon addition of 1 equiv. $\text{Ca}(\text{OTf})_2$ to $\text{KMnO}_4$ in $\text{CH}_3\text{CN}$ the stretching frequency of $\text{Mn}=\text{O}$ at $904\text{ cm}^{-1}$ is not shifted. .... | S5 |
| Fig. S3 Time trace for the oxidation of toluene by $\text{KMnO}_4$ in acetonitrile with 1 equivalent of $\text{Ca}(\text{OTf})_2$ and 2.8M acetic acid, Temperature: $22^\circ\text{C}$ . Conditions: $\text{KMnO}_4$ (0.01M), $\text{Ca}(\text{OTf})_2$ (0.01M), AcOH(2.8M), toluene(1M), solvent: $\text{CH}_3\text{CN}$ .....                                                                                                                                             | S5 |
| Fig. S4 UV-Vis monitoring the reaction of $\text{KMnO}_4$ (0.0003 M), $\text{Ba}(\text{OTf})_2$ (0.0003 M), AcOH (3 M) and cyclohexane (1 M) in $\text{CH}_3\text{CN}$ at $25^\circ\text{C}$ . ....                                                                                                                                                                                                                                                                          | S6 |
| Fig. S5 UV-Vis monitoring the reaction of $\text{KMnO}_4$ (0.0003 M), $\text{Mg}(\text{OTf})_2$ (0.0003 M), AcOH (3 M) and cyclohexane (1 M) in $\text{CH}_3\text{CN}$ at $25^\circ\text{C}$ . ....                                                                                                                                                                                                                                                                          | S6 |
| Fig. S6 UV-Vis monitoring the reaction of $\text{KMnO}_4$ (0.0003 M), $\text{Sc}(\text{OTf})_3$ (0.0003 M), AcOH (3 M) and cyclohexane (1 M) in $\text{CH}_3\text{CN}$ at $25^\circ\text{C}$ . ....                                                                                                                                                                                                                                                                          | S7 |
| Fig. S7 Mn2p XPS spectra of <b>1</b> and <b>2</b> . ....                                                                                                                                                                                                                                                                                                                                                                                                                     | S7 |

|                                                                                                                                                                                                                                                                                                  |     |
|--------------------------------------------------------------------------------------------------------------------------------------------------------------------------------------------------------------------------------------------------------------------------------------------------|-----|
| Fig. S8 Mn3s XPS spectra of <b>1</b> and <b>2</b> . .....                                                                                                                                                                                                                                        | S8  |
| Fig. S9 PESs for cyclohexane oxidation by $[\text{MnO}_4]^-/[\text{MnO}_4(\text{AcOH})]^-/[\text{MnO}_4(\text{AcOH})_3]^-/$<br>$[\text{MnO}_4(\text{CaOTf})]/[\text{MnO}_4(\text{CaOTf})(\text{AcOH})]/[\text{MnO}_4(\text{CaOTf})(\text{AcOH})_3]$ at the B3LYP-D3(BJ)/def2-<br>SVPD level..... | S9  |
| Fig. S10 PES and structures for cyclohexane oxidation by $[\text{MnO}_4(\text{AcOH})]^-$ at the B3LYP-<br>D3(BJ)/def2-SVPD level.....                                                                                                                                                            | S10 |
| Fig. S11 PES and structures for cyclohexane oxidation by $[\text{MnO}_4(\text{CaOTf})(\text{AcOH})]$ at the B3LYP-<br>D3(BJ)/def2-SVPD level.....                                                                                                                                                | S11 |
| Fig. S12 Arrhenius plot of the reaction of $\text{KMnO}_4$ (0.00025 M) with cyclohexane (1.0 M) in $\text{CH}_3\text{CN}$<br>in the presence of $\text{AcOH}$ (3.0 M) and $\text{Ca}(\text{OTf})_2$ (0.00025 M).....                                                                             | S12 |
| Table S1 Transition state of hydroxylation of cyclohexane by $\text{KMnO}_4$ via rebound mechanism of<br>$\text{KMnO}_4/\text{AcOH}/\text{Ca}(\text{OTf})_2$ system. ....                                                                                                                        | S13 |
| Table S2. XYZ coordinates of molecular species .....                                                                                                                                                                                                                                             | S14 |

## Experimental details

### Materials

KMnO<sub>4</sub> and Ca(OTf)<sub>2</sub> were purchased from Sigma-Aldrich and used as received. Reagent grade cyclohexane and acetic acid were obtained from Sigma-Aldrich and were purified according to standard methods.<sup>1</sup> Acetonitrile (RCI Labscan), toluene (VWR Chemicals), cyclohexanol (Johnson Matthey Electronics) and *d*<sub>12</sub>-cyclohexane (Cambridge Isotope Laboratories) were of analytical grade and were used as received.

### Instrumentations

Gas chromatographic analyses were performed on a HP 6890 gas chromatograph with a HP-5MS (25 m × 0.2 mm × 0.33 μm) or a HP-FFAP (25 m × 0.2 mm × 0.33 μm) column equipped with FID detector. GC-MS measurements were carried out on a HP 6890 gas chromatograph interfaced to a HP 5970 mass selective detector. UV-Vis spectroscopy was performed on an Agilent 8453 photodiode-array spectrophotometer. Elemental analysis was conducted with an Elementar Carbon-Hydrogen-Nitrogen micro-Analysers. ICP-AES was performed with a PerkinElmer Optima 6000 Spectrometer. Magnetic susceptibility was conducted with Sherwood Scientific Magnetic Susceptibility Balance (MK1) and the balance was calibrated with both Hg[Ca(SCN)<sub>4</sub>] and (NH<sub>4</sub>)<sub>2</sub>FeSO<sub>4</sub>. X-ray photoelectron spectroscopy was carried out with a PHI 5800 X-ray Photoelectron Spectrometer. Liquid Infrared spectra were recorded on a Nicolet iS50 FTIR spectrometer with a 1 mm KBr liquid cell.

### Stoichiometric oxidation of cyclohexane by KMnO<sub>4</sub>

#### (1) Stoichiometric oxidation of cyclohexane by KMnO<sub>4</sub>-AcOH in CH<sub>3</sub>CN

In a typical experiment, 0.031 mmol of KMnO<sub>4</sub> was added to a solution of CH<sub>3</sub>CN containing cyclohexane (0.314 ml), acetic acid (0.1-1.5 ml) and chlorobenzene (1 μL, as internal standard) at 23 °C (Total volume = 3.1 ml). 1 μL of the reaction mixture was withdrawn at different reaction times and analyzed with GC until the amount of product formed from the reaction became steady.

#### (2) Stoichiometric oxidation of cyclohexane by KMnO<sub>4</sub>-Ca(OTf)<sub>2</sub> in CH<sub>3</sub>CN

In a typical experiment, 0.031 mmol of KMnO<sub>4</sub> was added to a solution of CH<sub>3</sub>CN containing cyclohexane (0.314 ml), Ca(OTf)<sub>2</sub> (0.5 to 4 equivalents with respect to KMnO<sub>4</sub>) and chlorobenzene (1 μL, as internal standard) at 23 °C (Total volume = 3.1 ml). 1 μL of the reaction mixture was withdrawn at different reaction times and analyzed with GC.

#### (3) Stoichiometric oxidation of cyclohexane by KMnO<sub>4</sub>-Ca(OTf)<sub>2</sub>-AcOH in CH<sub>3</sub>CN

In a typical experiment, 0.031 mmol of KMnO<sub>4</sub> was added to a solution of CH<sub>3</sub>CN containing cyclohexane (0.314 ml), Ca(OTf)<sub>2</sub> (0.5 to 4 equivalents), AcOH (0.1 ml to 1.5 ml) and chlorobenzene (1 μL, as internal standard) at 23 °C (Total volume = 3.1 ml). 1 μL of the reaction mixture was withdrawn at different reaction times and analyzed with GC.

### Determination of KIE

#### (1) Stoichiometric oxidation of cyclohexane by KMnO<sub>4</sub>-AcOH in CH<sub>3</sub>CN

0.031 mmol of KMnO<sub>4</sub> was added to a solution of CH<sub>3</sub>CN containing cyclohexane (0.157 ml), *d*<sub>12</sub>-cyclohexane (0.157 ml), acetic acid (0.5 ml) and chlorobenzene (1 μL, as internal standard) at 23 °C (total volume = 3.1 ml). The reaction mixture was analyzed by GC fitted with a HP5MS column. The deuterated products were well separated and corresponding areas were used to calculate the KIE.

(2) Stoichiometric oxidation of cyclohexane by  $\text{KMnO}_4\text{-Ca}(\text{OTf})_2$  in  $\text{CH}_3\text{CN}$

0.031 mmol of  $\text{KMnO}_4$  was added to a solution of  $\text{CH}_3\text{CN}$  containing cyclohexane (0.157 ml),  $d_{12}$ -cyclohexane (0.157 ml),  $\text{Ca}(\text{OTf})_2$  (1 equivalent) and chlorobenzene (1  $\mu\text{L}$ , as internal standard) at 23 °C (Total volume = 3.1ml). The reaction mixture was analyzed by GC fitted with HP5MS column.

(3) Stoichiometric oxidation of cyclohexane by  $\text{KMnO}_4\text{-Ca}(\text{OTf})_2\text{-AcOH}$  in  $\text{CH}_3\text{CN}$

0.031 mmol of  $\text{KMnO}_4$  was added to a solution of  $\text{CH}_3\text{CN}$  containing cyclohexane (0.157 ml),  $d_{12}$ -cyclohexane (0.157 ml),  $\text{Ca}(\text{OTf})_2$  (1 equivalent), AcOH (0.5 ml) and chlorobenzene (1  $\mu\text{L}$ , as internal standard) at 23 °C (Total volume = 3.1ml). The reaction mixture was analyzed by GC fitted with HP5MS column.

### Determination of the oxidation state of the manganese product dation

(1) Oxidation of cyclohexane by  $\text{KMnO}_4$  in the presence of  $\text{Ca}(\text{OTf})_2$  and acetic acid in  $\text{CH}_3\text{CN}$

0.031 mmol of  $\text{KMnO}_4$  was dissolved in solution containing 1.69 ml of  $\text{CH}_3\text{CN}$ , 1 ml of acetic acid, 0.031 mmol of  $\text{Ca}(\text{OTf})_2$  and 0.31 ml of cyclohexane. The reaction was allowed to react in room temperature (23 °C) until the amount of cyclohexanone formed was constant based on GC analysis. 114 mg of  $\text{N}(\text{Bu})_4\text{I}$  and 1 ml of  $\text{CH}_3\text{CN}$  was added to the resulting solution. The solution turned brown immediately. 5  $\mu\text{L}$  of the brown solution was withdrawn by 5  $\mu\text{L}$ -syringe and added to 4 ml of solution in a 1 cm cuvette. The absorbance at 363 nm of the diluted solution was taken by a UV-vis spectrophotometer.

(2) Oxidation of cyclohexane by  $\text{KMnO}_4$  in the presence of  $\text{Ca}(\text{OTf})_2$  in  $\text{CH}_3\text{CN}$

Similar method as that of (1), except that 2.69 ml of  $\text{CH}_3\text{CN}$  was used for the oxidation.

(3) Oxidation of cyclohexane by  $\text{KMnO}_4$  in the presence of AcOH in  $\text{CH}_3\text{CN}$

Similar method as that of (1), except no  $\text{Ca}(\text{OTf})_2$  was added to the reaction mixture for the oxidation.

### Stoichiometric oxidation of toluene by $\text{KMnO}_4\text{-Ca}(\text{OTf})_2\text{-AcOH}$ in $\text{CH}_3\text{CN}$

0.031 mmol of  $\text{KMnO}_4$  was added to a solution of  $\text{CH}_3\text{CN}$  containing toluene (0.33 ml), (1 equivalent), acetic acid (0.5 ml) and chlorobenzene (1  $\mu\text{L}$ , as internal standard) at 23 °C (Total volume = 3.1 ml). 50  $\mu\text{L}$  of the reaction mixture was withdrawn and then added to 50  $\mu\text{L}$  of isopropanol to quench the reaction at different reaction time, 1  $\mu\text{L}$  of the resulting solution was withdrawn and analyzed by GC. The yield was taken when the amount of product determined from the GC analysis became steady.

### Analysis of manganese product (brown solid)

|                                                                                                                   | MW   | Ca (%) | Mn (%) | C (%) | N (%) | H (%) |
|-------------------------------------------------------------------------------------------------------------------|------|--------|--------|-------|-------|-------|
| Experimental results                                                                                              |      | 6.25   | 22.45  | 6.82  | 1.59  | 3.15  |
| $\text{Ca}_2\text{Mn}_5\text{O}_{10}(\text{CF}_3\text{SO}_3)_4(\text{CH}_3\text{CN})\cdot 13\text{H}_2\text{O}$   | 1368 | 5.84   | 20.10  | 5.26  | 1.02  | 2.12  |
| $\text{Ca}_3\text{Mn}_7\text{O}_{14}(\text{CF}_3\text{SO}_3)_6(\text{CH}_3\text{CN})_2\cdot 10\text{H}_2\text{O}$ | 1885 | 6.37   | 20.42  | 6.37  | 1.49  | 1.38  |
| $\text{Ca}_3\text{Mn}_8\text{O}_{16}(\text{CF}_3\text{SO}_3)_6(\text{CH}_3\text{CN})_2\cdot 20\text{H}_2\text{O}$ | 2125 | 5.65   | 20.71  | 5.65  | 1.32  | 2.16  |

## DFT Calculations.

The structures and energies of all molecular species were calculated at the B3LYP-D3(BJ) level<sup>2</sup> with the def2-SVPD basis sets<sup>3-4</sup>. The polarizable continuum model (PCM)<sup>5-6</sup> was used to account for the solvent effect in acetonitrile and the D3 version<sup>7</sup> of Grimme's dispersion with Becke-Johnson damping were included. All calculations were performed with Gaussian 16 package of program.<sup>8</sup>

## References

1. D. D. Perrin and W. L. F. Armarego, *Purification of Laboratory Chemicals*, 3<sup>rd</sup> ed., Pergamon Press, Oxford, 1988.
2. A. D. Becke, *J. Chem. Phys.* 1993, **98**, 5648.
3. F. Weigend and R. Ahlrichs, *Phys. Chem. Chem. Phys.* 2005, **7**, 3297.
4. D. Rappoport and F. Furche, *J. Chem. Phys.* 2010, **133**, 134105.
5. S. Miertuš, E. Scrocco and J. Tomasi, *Chem. Phys.* 1981, **55**, 117-129.
6. S. Miertuš and J. Tomasi, *Chem. Phys.* 1982, **65**, 239-245.
7. S. Grimme, S. Ehrlich and L. Goerigk, *J. Comput. Chem.* 2011, **32**, 1456-1465.
8. Gaussian 16, Revision A.03, M. J. Frisch, G. W. Trucks, H. B. Schlegel, G. E. Scuseria, M. A. Robb, J. R. Cheeseman, G. Scalmani, V. Barone, G. A. Petersson, H. Nakatsuji, X. Li, M. Caricato, A. V. Marenich, J. Bloino, B. G. Janesko, R. Gomperts, B. Mennucci, H. P. Hratchian, J. V. Ortiz, A. F. Izmaylov, J. L. Sonnenberg, D. Williams-Young, F. Ding, F. Lipparini, F. Egidi, J. Goings, B. Peng, A. Petrone, T. Henderson, D. Ranasinghe, V. G. Zakrzewski, J. Gao, N. Rega, G. Zheng, W. Liang, M. Hada, M. Ehara, K. Toyota, R. Fukuda, J. Hasegawa, M. Ishida, T. Nakajima, Y. Honda, O. Kitao, H. Nakai, T. Vreven, K. Throssell, J. A. Montgomery, Jr., J. E. Peralta, F. Ogliaro, M. J. Bearpark, J. J. Heyd, E. N. Brothers, K. N. Kudin, V. N. Staroverov, T. A. Keith, R. Kobayashi, J. Normand, K. Raghavachari, A. P. Rendell, J. C. Burant, S. S. Iyengar, J. Tomasi, M. Cossi, J. M. Millam, M. Klene, C. Adamo, R. Cammi, J. W. Ochterski, R. L. Martin, K. Morokuma, O. Farkas, J. B. Foresman, and D. J. Fox, Gaussian, Inc., Wallingford CT, 2016.

## Figures and Tables

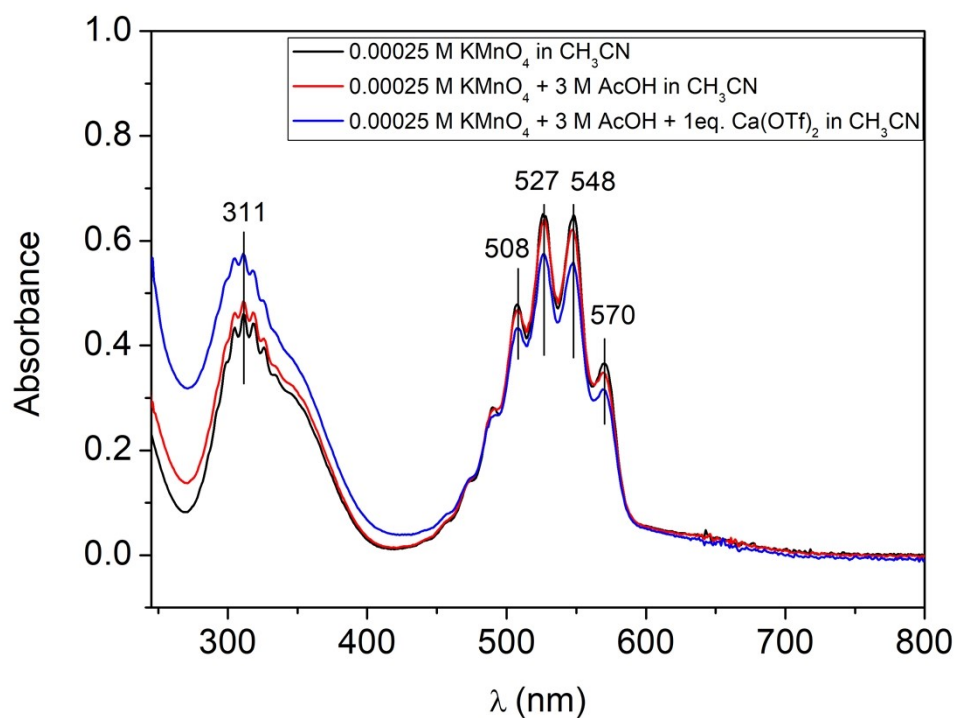

**Fig. S1** UV-Vis spectra of  $\text{KMnO}_4$  in  $\text{CH}_3\text{CN}$ ,  $\text{KMnO}_4$  and 3 M AcOH in  $\text{CH}_3\text{CN}$  (using 3 M AcOH as background), and  $\text{KMnO}_4$ , 3 M AcOH and 1 eq.  $\text{Ca}(\text{OTf})_2$  in  $\text{CH}_3\text{CN}$  (using 3 M AcOH as background). In spectrum of  $\text{KMnO}_4$ , 3 M AcOH and 1 eq.  $\text{Ca}(\text{OTf})_2$  in  $\text{CH}_3\text{CN}$  (blue), the absorbance at 527 nm decreased as the  $\text{KMnO}_4$  decayed slightly after addition of  $\text{Ca}(\text{OTf})_2$ .

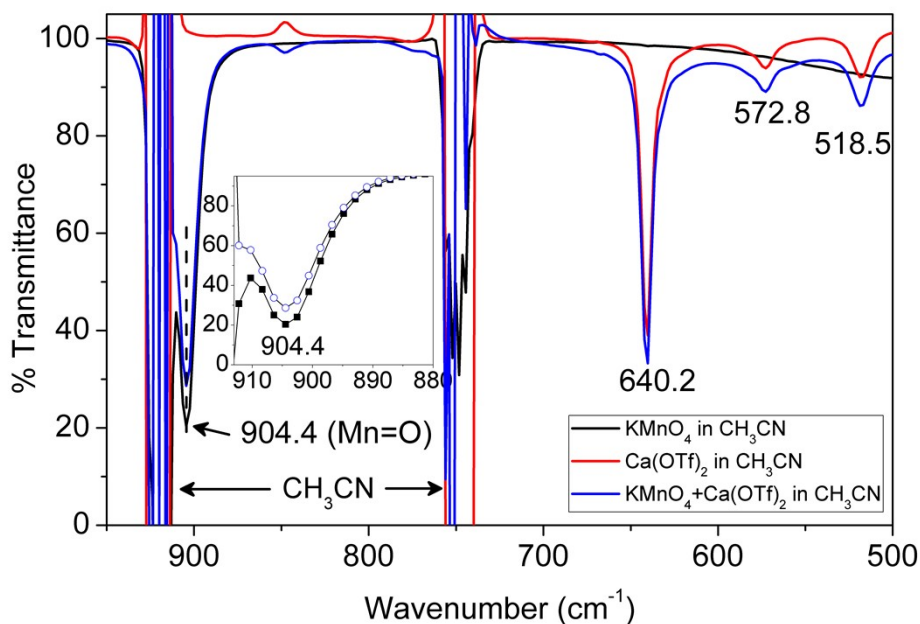

**Fig. S2** Solution IR spectra (950-500  $\text{cm}^{-1}$ ) of  $\text{KMnO}_4$  (2.5 mM),  $\text{Ca}(\text{OTf})_2$  (2.5 mM) and  $\text{KMnO}_4 + \text{Ca}(\text{OTf})_2$  (2.5 mM) in  $\text{CH}_3\text{CN}$  measured with a 1 mm KBr IR cell. The IR spectra show that upon addition of 1 equiv.  $\text{Ca}(\text{OTf})_2$  to  $\text{KMnO}_4$  in  $\text{CH}_3\text{CN}$  the stretching frequency of  $\text{Mn}=\text{O}$  at  $904 \text{ cm}^{-1}$  is not shifted.

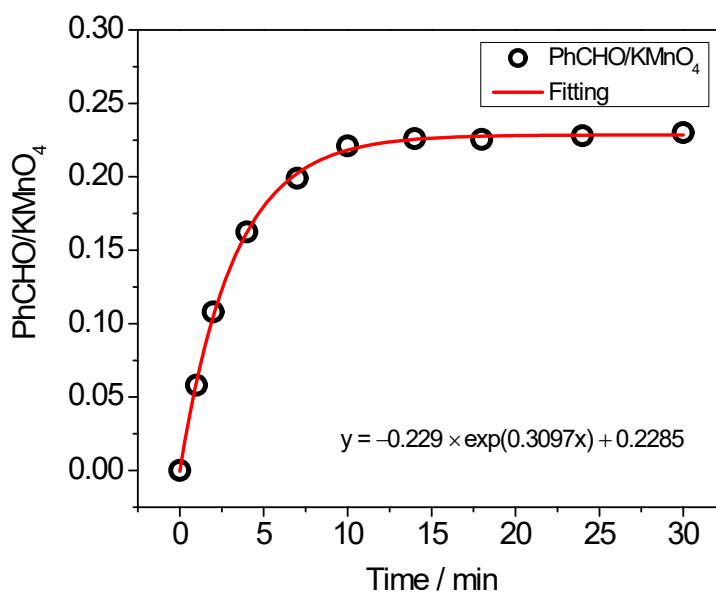

**Fig. S3** Time trace for the oxidation of toluene by  $\text{KMnO}_4$  in acetonitrile with 1 equivalent of  $\text{Ca}(\text{OTf})_2$  and 2.8M acetic acid, Temperature:  $22^\circ\text{C}$ . Conditions:  $\text{KMnO}_4$  (0.01M),  $\text{Ca}(\text{OTf})_2$  (0.01M), AcOH (2.8M), toluene (1M), solvent:  $\text{CH}_3\text{CN}$

Assuming  $\text{KMnO}_4$  also acted as a 3-electron oxidant as that for the oxidation in cyclohexane, the yield for the oxidation of toluene is 30.7%.

$k_{\text{obs}}$  for the reaction  $0.31 \text{ min}^{-1}$ . The oxidation of cyclohexane under the same conditions:  $k_{\text{obs}} = 0.054 \text{ min}^{-1}$  (yield: 57 %). Therefore, the ratio of  $k_{\text{obsd}}$  of toluene to cyclohexane = 5.75:1.



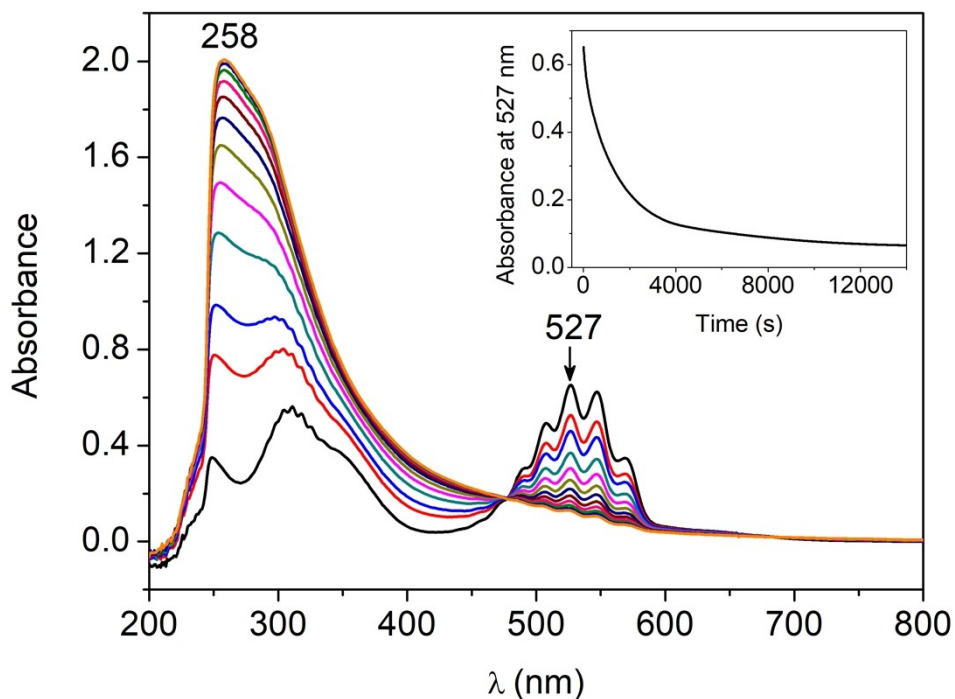

**Fig. S4** UV-Vis monitoring the reaction of  $\text{KMnO}_4$  (0.0003 M),  $\text{Ba}(\text{OTf})_2$  (0.0003 M), AcOH (3 M) and cyclohexane (1 M) in  $\text{CH}_3\text{CN}$  at 25 °C. 3 M AcOH in  $\text{CH}_3\text{CN}$  was used as background in measurement.

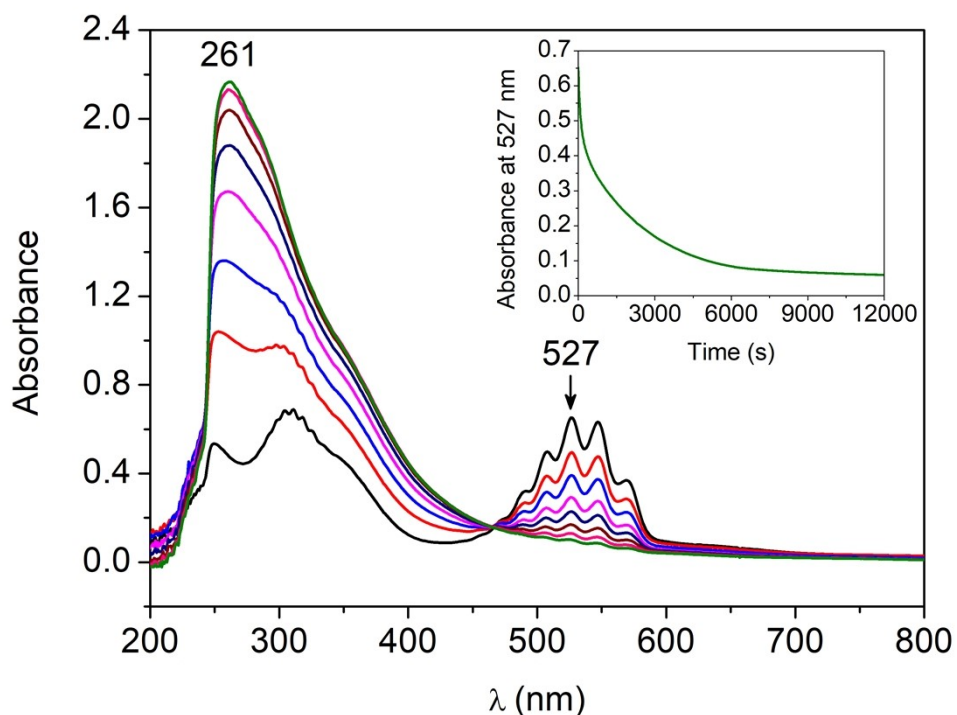

**Fig. S5** UV-Vis monitoring the reaction of  $\text{KMnO}_4$  (0.0003 M),  $\text{Mg}(\text{OTf})_2$  (0.0003 M), AcOH (3 M) and cyclohexane (1 M) in  $\text{CH}_3\text{CN}$  at 25 °C. 3 M AcOH in  $\text{CH}_3\text{CN}$  was used as background in measurement.

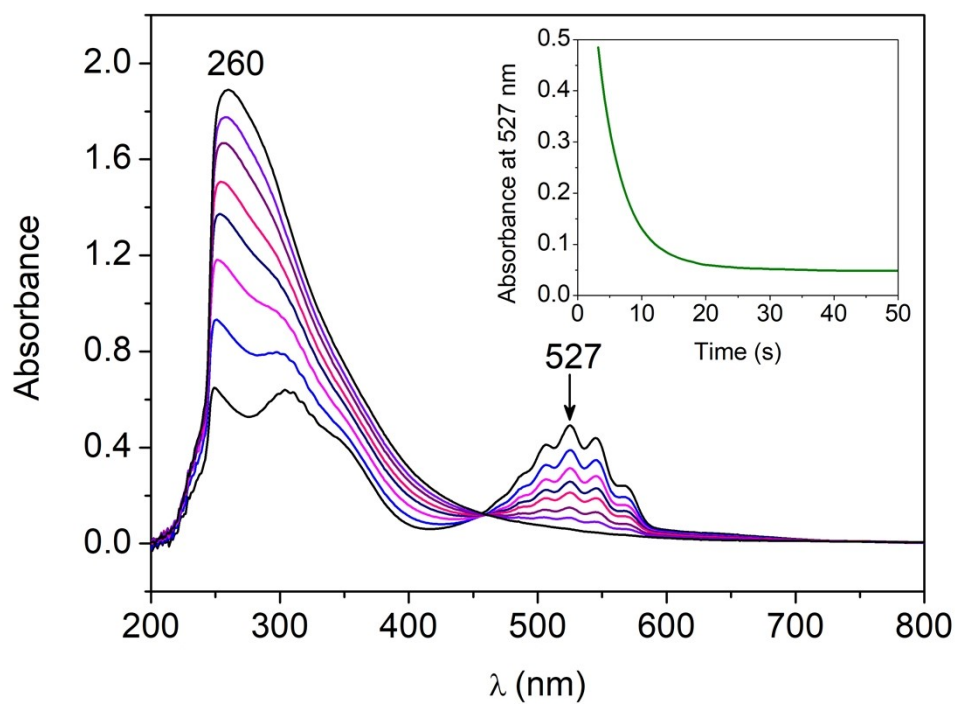

**Fig. S6** UV-Vis monitoring the reaction of  $\text{KMnO}_4$  (0.0003 M),  $\text{Sc}(\text{OTf})_3$  (0.0003 M), AcOH (3 M) and cyclohexane (1 M) in  $\text{CH}_3\text{CN}$  at 25 °C. 3 M AcOH in  $\text{CH}_3\text{CN}$  was used as background in measurement.

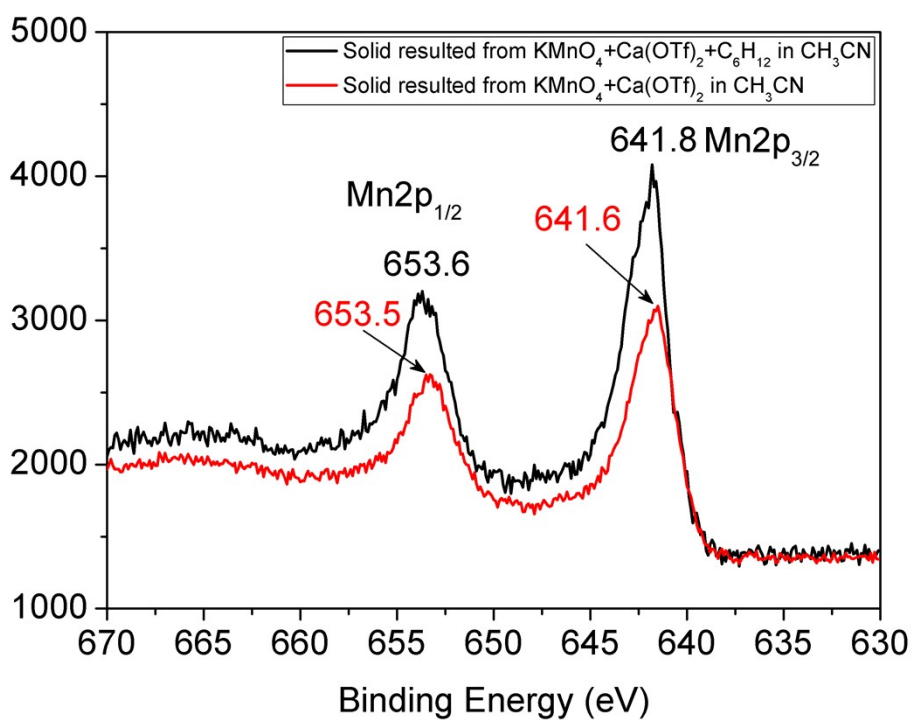

**Fig. S7** Mn2p XPS spectra of 1 and 2.

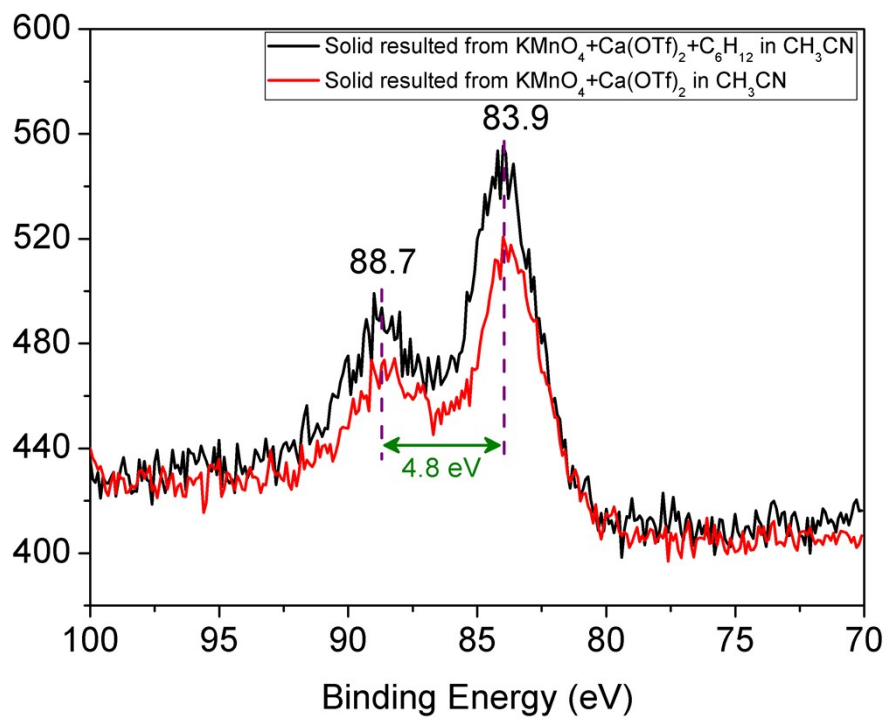

**Fig. S8** Mn3s XPS spectra of **1** and **2**.

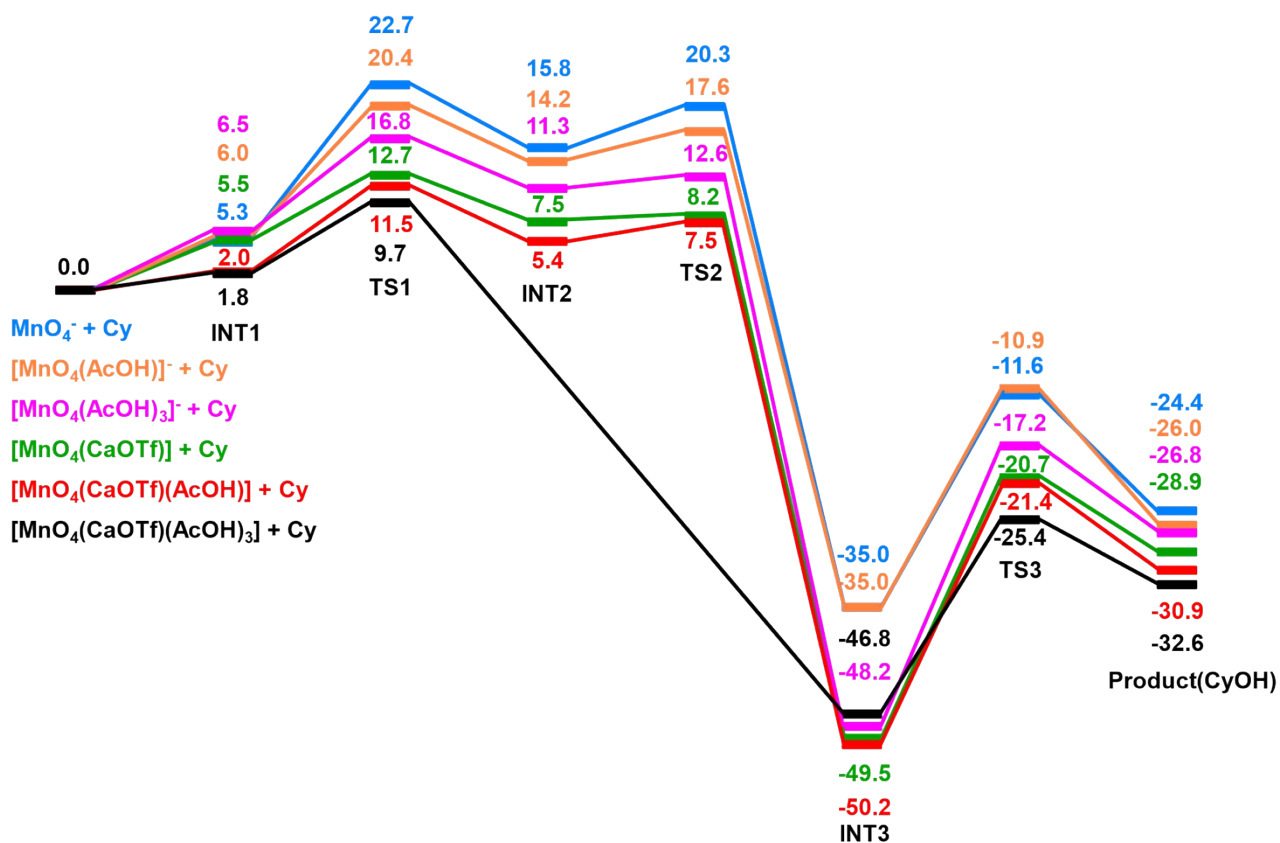

**Fig. S9** PESs for cyclohexane oxidation by  $[\text{MnO}_4]^-/[\text{MnO}_4(\text{AcOH})]^-/[\text{MnO}_4(\text{AcOH})_3]^-/[\text{MnO}_4(\text{CaOTf})]/[\text{MnO}_4(\text{CaOTf})(\text{AcOH})]/[\text{MnO}_4(\text{CaOTf})(\text{AcOH})_3]$  at the B3LYP-D3(BJ)/def2-SVPD level. Relative 298 K Gibbs free energies in acetonitrile are given in  $\text{kcal mol}^{-1}$ .

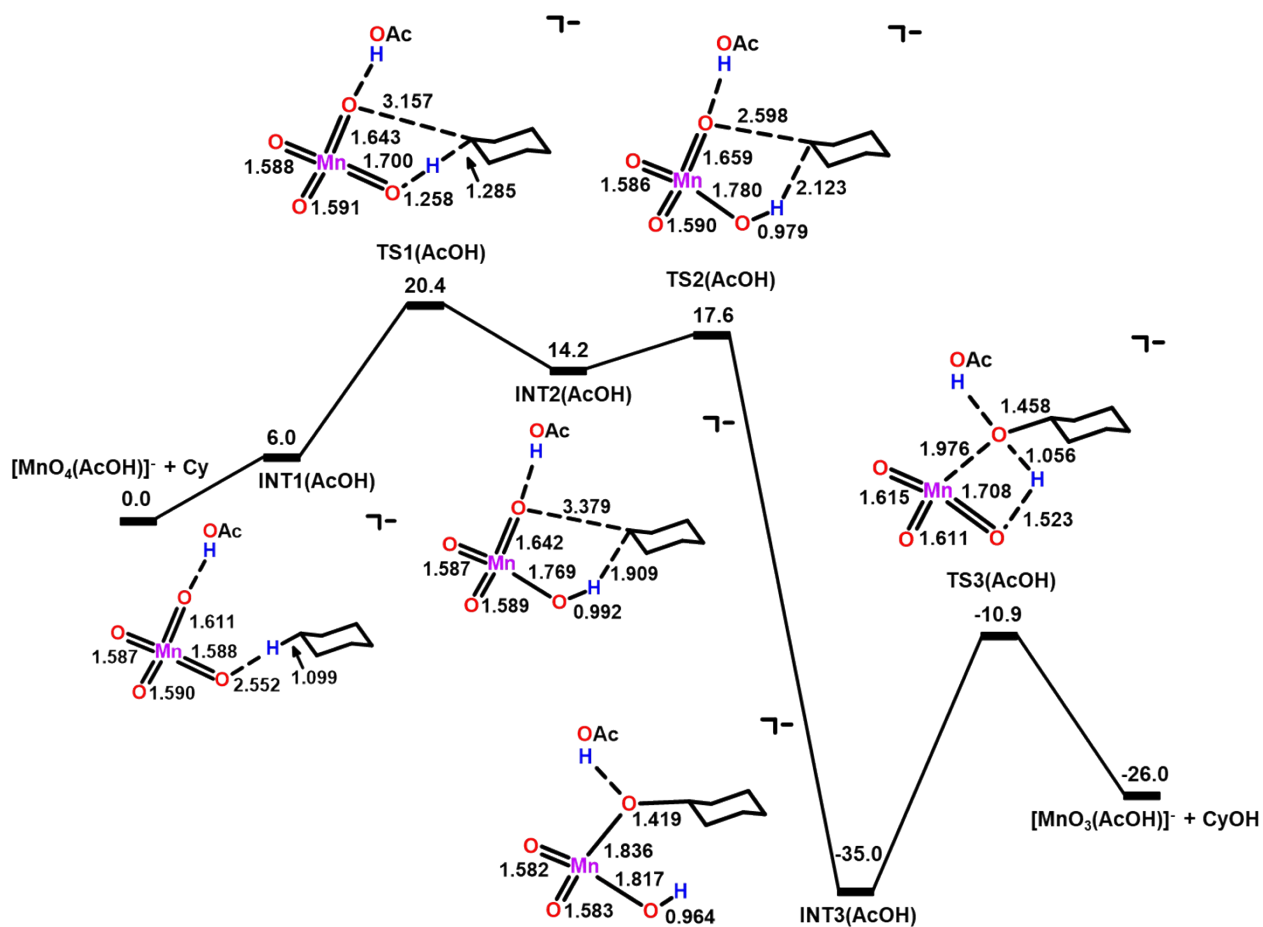

**Fig. S10** PES and structures for cyclohexane oxidation by  $[\text{MnO}_4(\text{AcOH})]^-$  at the B3LYP-D3(BJ)/def2-SVPD level. Relative 298 K Gibbs free energies in acetonitrile are given in kcal mol<sup>-1</sup>.

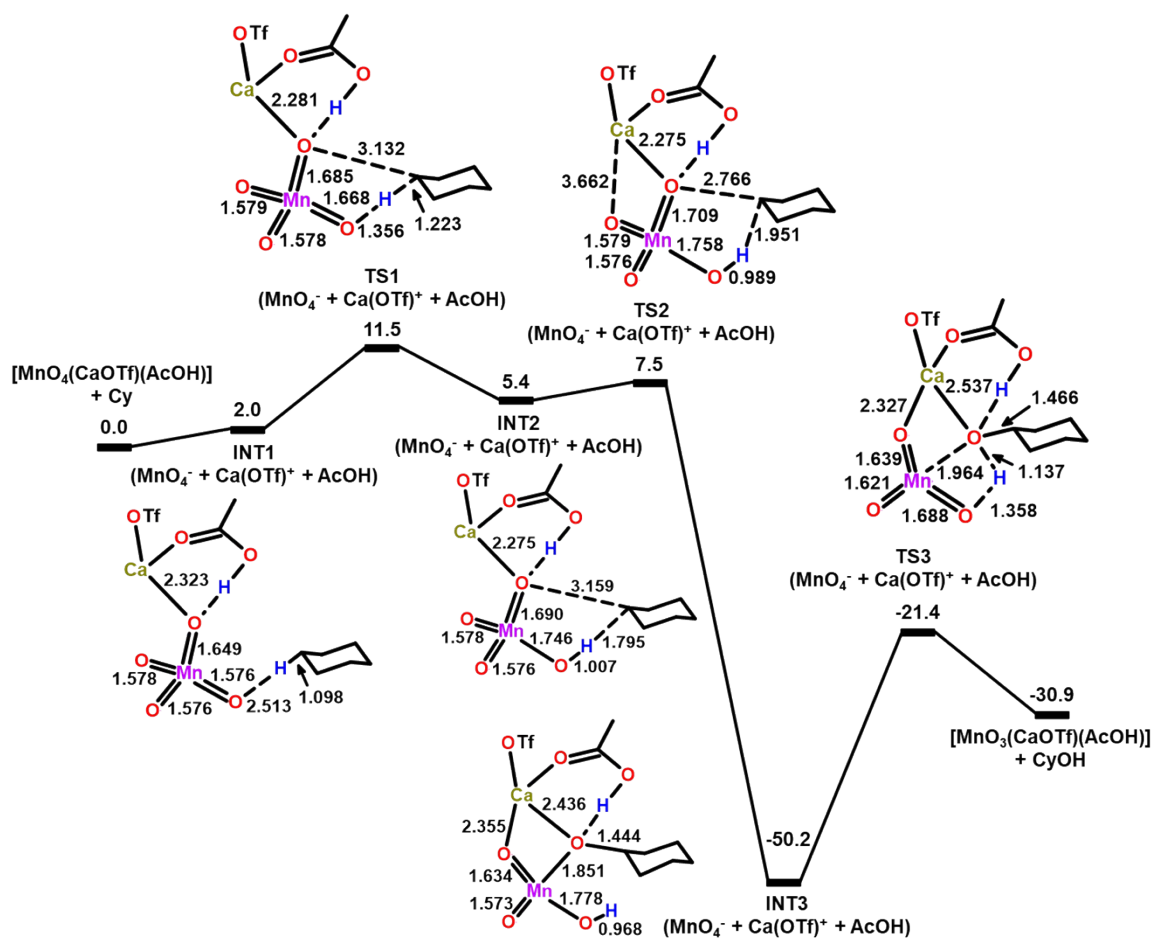

**Fig. S11** PES and structures for cyclohexane oxidation by [MnO<sub>4</sub>(CaOTf)(AcOH)] at the B3LYP-D3(BJ)/def2-SVPD level. Relative 298 K Gibbs free energies in acetonitrile are given in kcal mol<sup>-1</sup>.

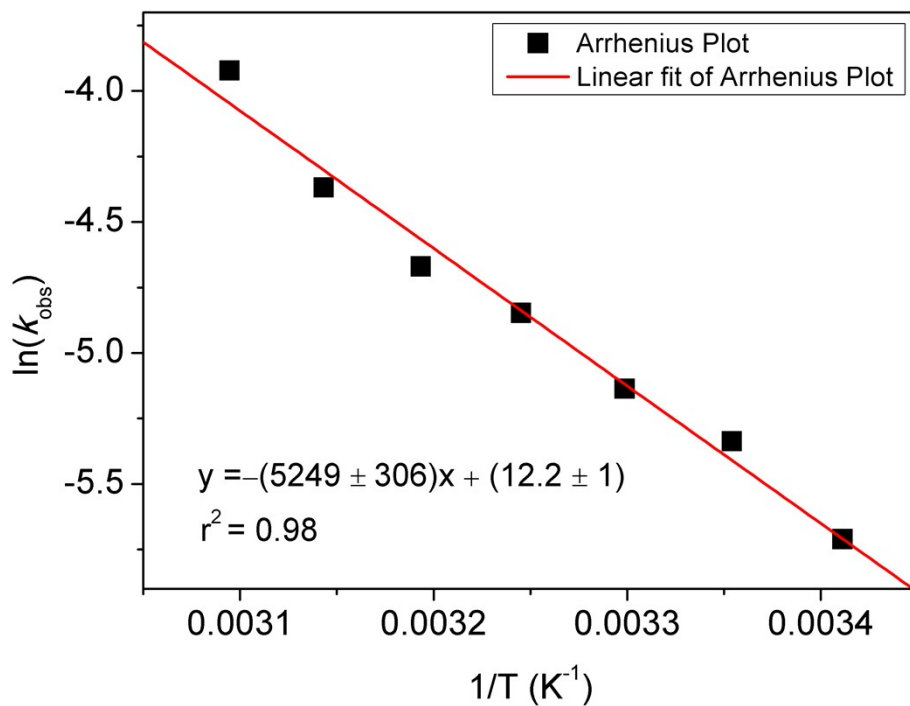

**Fig. S12** Arrhenius plot of the reaction of  $\text{KMnO}_4$  (0.00025 M) with cyclohexane (1.0 M) in  $\text{CH}_3\text{CN}$  in the presence of  $\text{AcOH}$  (3.0 M) and  $\text{Ca}(\text{OTf})_2$  (0.00025 M). Rate constants in temperature range of 20-50 °C were obtained by Pseudo-first-order reaction fitting of the absorbance of  $\text{KMnO}_4$  at 527 nm.  $\Delta G^\ddagger = 10.4 \pm 0.6$  kcal/mol.

**Table S1** Transition state of hydroxylation of cyclohexane by  $\text{KMnO}_4$  via rebound mechanism of  $\text{KMnO}_4/\text{AcOH}/\text{Ca}(\text{OTf})_2$  system.

|                                   | TS for hydroxylation via rebound mechanism and $\Delta G_{298}^\ddagger$ | $\Delta G_{298}^\ddagger$ (current TS2) |
|-----------------------------------|--------------------------------------------------------------------------|-----------------------------------------|
| $\text{MnO}_4^-$                  | <p><math>\Delta G_{298}^\ddagger = 22.9</math></p>                       | 20.3                                    |
| $\text{MnO}_4^-/\text{AcOH}$      | <p><math>\Delta G_{298}^\ddagger = 19.6</math></p>                       | 17.6                                    |
| $\text{MnO}_4^-/(\text{CaOTf})^+$ | <p><math>\Delta G_{298}^\ddagger = 11.6</math></p>                       | 8.2                                     |



**Table S2.** XYZ coordinates of molecular speciesMnO<sub>4</sub><sup>-</sup>

INT1

|    |             |             |             |
|----|-------------|-------------|-------------|
| Mn | 2.12609400  | 0.00049900  | -0.09710400 |
| O  | 1.87185700  | 0.30097000  | 1.44750600  |
| O  | 3.67796400  | -0.29002900 | -0.33224700 |
| O  | 1.68427200  | 1.26195600  | -0.96636200 |
| O  | 1.27491700  | -1.27192800 | -0.53694900 |
| H  | -0.63005200 | -0.60018500 | 1.62509800  |
| C  | -2.07510000 | -1.40634400 | 0.21775500  |
| C  | -1.63117100 | -0.35654000 | 1.24258200  |
| C  | -1.62487300 | 1.05063400  | 0.63586200  |
| C  | -2.98072600 | 1.40559500  | 0.01465300  |
| C  | -3.41422100 | 0.35504200  | -1.01494600 |
| C  | -3.43061700 | -1.05164400 | -0.40444200 |
| H  | -1.34797500 | 1.79180100  | 1.40093800  |
| H  | -2.32053700 | -0.37607700 | 2.10478000  |
| H  | -1.31127600 | -1.46462500 | -0.57396700 |
| H  | -2.11876700 | -2.40103700 | 0.68739800  |
| H  | -3.74220000 | 1.46330200  | 0.81135000  |
| H  | -2.93743800 | 2.40140900  | -0.45204700 |
| H  | -4.40441100 | 0.60606100  | -1.42487200 |
| H  | -2.70749800 | 0.37025700  | -1.86232700 |
| H  | -4.21038700 | -1.09495100 | 0.37542900  |
| H  | -3.70740000 | -1.79513800 | -1.16729200 |
| H  | -0.84624600 | 1.09849200  | -0.14126300 |

TS1

|    |             |             |             |
|----|-------------|-------------|-------------|
| Mn | 2.26040200  | 0.01045000  | -0.02087900 |
| O  | 1.52489400  | 0.64207300  | 1.28056900  |
| O  | 3.35692500  | -1.06023800 | 0.43404300  |
| O  | 2.80262300  | 1.17458700  | -0.97001100 |
| O  | 0.95845000  | -0.78996200 | -0.78231100 |
| H  | -0.08339800 | -0.55142300 | -0.15713000 |
| C  | -2.14352500 | -1.38877400 | -0.20104300 |
| C  | -1.25148400 | -0.30181100 | 0.35669400  |
| C  | -1.61861800 | 1.09199000  | -0.09575900 |
| C  | -3.09516700 | 1.38872600  | 0.24474800  |
| C  | -4.02460000 | 0.31063900  | -0.32194300 |
| C  | -3.61735800 | -1.08888900 | 0.14990000  |
| H  | -0.95685100 | 1.83477300  | 0.36716600  |
| H  | -1.08019900 | -0.38099700 | 1.43694200  |
| H  | -2.04353900 | -1.42215500 | -1.29844800 |
| H  | -1.85074500 | -2.37501900 | 0.18460700  |
| H  | -3.20970000 | 1.43055500  | 1.34033000  |
| H  | -3.36917600 | 2.38108800  | -0.14289000 |
| H  | -5.06568300 | 0.51865700  | -0.03251100 |
| H  | -3.98892200 | 0.34495900  | -1.42389100 |
| H  | -3.74882800 | -1.15922100 | 1.24203600  |
| H  | -4.26531100 | -1.85537500 | -0.30047700 |

|   |             |            |             |
|---|-------------|------------|-------------|
| H | -1.48632800 | 1.16994200 | -1.18767300 |
|---|-------------|------------|-------------|

INT2

|    |             |             |             |
|----|-------------|-------------|-------------|
| Mn | 2.34567700  | 0.02630100  | -0.04767800 |
| O  | 1.63579600  | 0.55633000  | 1.31246100  |
| O  | 3.53743200  | -0.97827600 | 0.30079700  |
| O  | 2.70627900  | 1.25102800  | -1.00502600 |
| O  | 1.02135000  | -0.90347300 | -0.78381700 |
| H  | 0.21498000  | -0.76959000 | -0.22956800 |
| C  | -2.31019500 | -1.42345200 | -0.04239400 |
| C  | -1.47363800 | -0.38415000 | 0.63528700  |
| C  | -1.64843400 | 1.02696700  | 0.17243300  |
| C  | -3.14505800 | 1.42252300  | 0.20938400  |
| C  | -4.00543600 | 0.40191300  | -0.54328000 |
| C  | -3.80494000 | -1.01780000 | -0.00246000 |
| H  | -1.04312300 | 1.71789000  | 0.77202300  |
| H  | -1.09628900 | -0.57005100 | 1.64208400  |
| H  | -2.01675100 | -1.50338600 | -1.10534600 |
| H  | -2.16585500 | -2.41386900 | 0.40945200  |
| H  | -3.47591700 | 1.47544300  | 1.25922500  |
| H  | -3.27163000 | 2.42793100  | -0.21851100 |
| H  | -5.06730300 | 0.68275500  | -0.47791500 |
| H  | -3.73737600 | 0.42221700  | -1.61332900 |
| H  | -4.16176600 | -1.06624300 | 1.03890700  |
| H  | -4.39851000 | -1.74133400 | -0.58057300 |
| H  | -1.30302500 | 1.11983300  | -0.87363200 |

TS2

|    |             |             |             |
|----|-------------|-------------|-------------|
| Mn | 2.21293000  | 0.03453900  | -0.03645600 |
| O  | 1.15172900  | 0.07087500  | 1.21511000  |
| O  | 3.40467000  | -0.98672400 | 0.26339500  |
| O  | 2.58694500  | 1.50951600  | -0.51192200 |
| O  | 1.07902700  | -0.69516300 | -1.21115700 |
| H  | 0.24665700  | -0.76619200 | -0.70577500 |
| C  | -1.99230600 | -1.38002600 | 0.02458400  |
| C  | -1.29777400 | -0.25299700 | 0.72901900  |
| C  | -1.54656000 | 1.11488000  | 0.18476300  |
| C  | -3.07121700 | 1.39163100  | 0.15260000  |
| C  | -3.82264900 | 0.27416600  | -0.57956600 |
| C  | -3.51963700 | -1.10277600 | 0.02099700  |
| H  | -1.02567000 | 1.87652900  | 0.77775400  |
| H  | -1.14312000 | -0.35367900 | 1.80171700  |
| H  | -1.67471300 | -1.44604300 | -1.03064400 |
| H  | -1.77592200 | -2.34761400 | 0.49619800  |
| H  | -3.44296200 | 1.46453200  | 1.18741600  |
| H  | -3.25926400 | 2.36449700  | -0.32518800 |
| H  | -4.90551500 | 0.46692000  | -0.55155200 |
| H  | -3.52752800 | 0.27614400  | -1.64249200 |
| H  | -3.89488600 | -1.14459200 | 1.05595900  |
| H  | -4.03406800 | -1.89599100 | -0.54147700 |

|   |             |            |             |
|---|-------------|------------|-------------|
| H | -1.16435600 | 1.18471300 | -0.84828500 |
|---|-------------|------------|-------------|

INT3

|    |             |             |             |
|----|-------------|-------------|-------------|
| Mn | 1.87704900  | 0.03326300  | -0.01681500 |
| O  | 0.49522300  | -0.38674400 | 1.05351700  |
| O  | 3.08569300  | -0.97497800 | 0.30174400  |
| O  | 2.20230700  | 1.60567600  | 0.03007900  |
| O  | 1.21985400  | -0.32348100 | -1.66984900 |
| H  | 0.56244200  | -1.03025900 | -1.62186000 |
| C  | -1.55815500 | -1.34195700 | 0.12235600  |
| C  | -0.89000400 | -0.17459200 | 0.85852600  |
| C  | -1.22464800 | 1.16199400  | 0.18982100  |
| C  | -2.74135900 | 1.36451000  | 0.08976600  |
| C  | -3.41771700 | 0.19634200  | -0.63649200 |
| C  | -3.07561500 | -1.14206600 | 0.02753100  |
| H  | -0.75839000 | 1.97665400  | 0.76040800  |
| H  | -1.32277400 | -0.14753600 | 1.87741100  |
| H  | -1.14908300 | -1.41334600 | -0.89814400 |
| H  | -1.31321900 | -2.28177900 | 0.63661300  |
| H  | -3.16489100 | 1.45244100  | 1.10440100  |
| H  | -2.95853300 | 2.31266300  | -0.42344900 |
| H  | -4.50780400 | 0.34212100  | -0.66210100 |
| H  | -3.07482500 | 0.17622100  | -1.68475200 |
| H  | -3.50752400 | -1.16503200 | 1.04188100  |
| H  | -3.53086800 | -1.97562000 | -0.52653000 |
| H  | -0.78037700 | 1.17274300  | -0.81648100 |

TS3

|    |             |             |             |
|----|-------------|-------------|-------------|
| Mn | 1.86194100  | 0.08682100  | -0.21355100 |
| O  | 0.49382500  | -0.16553100 | 1.15742400  |
| O  | 1.25458400  | 0.15767500  | -1.70421200 |
| O  | 2.90792400  | 1.21812200  | 0.24857900  |
| O  | 2.17012600  | -1.51048100 | 0.35550500  |
| H  | 1.01398800  | -1.12155300 | 1.10110100  |
| C  | -1.34743600 | 1.23481200  | 0.43662800  |
| C  | -0.93043300 | -0.14344000 | 0.93393300  |
| C  | -1.38123800 | -1.24859300 | -0.01649000 |
| C  | -2.89861300 | -1.18836200 | -0.23328100 |
| C  | -3.33559700 | 0.19278700  | -0.73390000 |
| C  | -2.86324500 | 1.30070400  | 0.21429500  |
| H  | -1.08535500 | -2.22810900 | 0.38586600  |
| H  | -1.37926000 | -0.31790400 | 1.92604100  |
| H  | -0.82434400 | 1.42748100  | -0.51263200 |
| H  | -1.02044500 | 1.99888900  | 1.15570100  |
| H  | -3.41302000 | -1.40995000 | 0.71662600  |
| H  | -3.20161400 | -1.97002800 | -0.94420800 |
| H  | -4.42903300 | 0.22867000  | -0.84696100 |
| H  | -2.90531900 | 0.36627900  | -1.73429600 |
| H  | -3.37944700 | 1.19456900  | 1.18291900  |
| H  | -3.13651300 | 2.28930600  | -0.18100200 |

H -0.86045800 -1.11390100 -0.97587500

MnO<sub>4</sub><sup>-</sup>/AcOH

INT1

O 4.15503300 -0.32071600 -0.22542500  
O 1.79448400 0.54212400 -0.93114500  
O 2.13273900 -1.94808900 -0.22466700  
O 2.28698600 -0.07571100 1.55976100  
C -1.20980400 -0.83730300 0.72287900  
C -1.25582300 -1.32057400 -0.72983200  
C -2.40581200 -2.30883300 -0.95412000  
C -3.74938000 -1.70907800 -0.52065300  
C -3.70482000 -1.22522600 0.93408900  
C -2.55147000 -0.24078800 1.16059000  
H -2.44767500 -2.61410600 -2.01052200  
H -1.39369700 -0.44966900 -1.38996900  
H -0.29263800 -1.77480800 -1.00087500  
H -0.96258800 -1.69007500 1.37808100  
H -0.40542700 -0.10422000 0.85618900  
H -3.98769600 -0.85351500 -1.17570800  
H -4.55823300 -2.44343900 -0.65408500  
H -4.66373600 -0.76232600 1.21189600  
H -3.57016700 -2.09548900 1.59860000  
H -2.74523400 0.67475900 0.57799100  
H -2.50693800 0.06407500 2.21667800  
H -2.21499600 -3.22468500 -0.36893700  
C -2.07064900 3.46089200 -0.39598500  
H -2.46492800 3.87369900 0.53680400  
H -2.81668700 2.81313200 -0.87424600  
H -1.84925700 4.27869600 -1.09606800  
C -0.80768200 2.68718100 -0.12658600  
O -0.22355900 2.67385800 0.94171500  
O -0.38291200 2.01852900 -1.19602300  
H 0.43771600 1.49103200 -0.99204600  
Mn 2.59490600 -0.45362600 0.05000800

TS1

O 3.58927600 -1.38027700 -0.72042000  
O 1.62708600 0.37010700 -0.99618800  
O 1.25823300 -1.65109300 0.58876400  
O 2.96947500 0.29388700 1.28928600  
C -1.64859200 -0.34825800 0.96733700  
C -1.07341600 -1.07302300 -0.22643400  
C -1.74770300 -2.39077100 -0.52685100  
C -3.25752800 -2.14654900 -0.75443200  
C -3.88904200 -1.40640500 0.42969400  
C -3.15463400 -0.09742600 0.73830000  
H -1.30257200 -2.87167200 -1.40842400  
H -0.95744500 -0.43388300 -1.10787800  
H 0.13557000 -1.35255600 0.10687500

|    |             |             |             |
|----|-------------|-------------|-------------|
| H  | -1.52620300 | -0.96955800 | 1.86927300  |
| H  | -1.12085700 | 0.59466200  | 1.15026700  |
| H  | -3.38780100 | -1.54840900 | -1.67081000 |
| H  | -3.76229200 | -3.10875300 | -0.92534600 |
| H  | -4.95057000 | -1.20421200 | 0.22300300  |
| H  | -3.85755200 | -2.05569100 | 1.32033500  |
| H  | -3.27879800 | 0.60096200  | -0.10496900 |
| H  | -3.58413500 | 0.39177600  | 1.62465500  |
| H  | -1.62275300 | -3.07857400 | 0.32480800  |
| C  | -1.68825200 | 3.77793300  | -0.36642000 |
| H  | -1.77651300 | 4.49764900  | 0.45232300  |
| H  | -2.59401200 | 3.15593400  | -0.40925100 |
| H  | -1.60388500 | 4.29967700  | -1.32845300 |
| C  | -0.49527900 | 2.88370000  | -0.15118800 |
| O  | 0.16590700  | 2.86201700  | 0.87431000  |
| O  | -0.25051400 | 2.09985200  | -1.19172100 |
| H  | 0.51316300  | 1.45621300  | -1.01401200 |
| Mn | 2.46110500  | -0.57298800 | 0.05941300  |

#### INT2

|   |             |             |             |
|---|-------------|-------------|-------------|
| O | 3.70702600  | -1.42371100 | -0.67521800 |
| O | 1.74247800  | 0.32677700  | -0.98765200 |
| O | 1.29368400  | -1.77260300 | 0.54166600  |
| O | 2.98509100  | 0.20785500  | 1.35654600  |
| C | -1.69926800 | -0.35039000 | 0.91032400  |
| C | -1.32109500 | -0.97038800 | -0.39661800 |
| C | -2.05741000 | -2.21620700 | -0.76914000 |
| C | -3.58317600 | -1.93348900 | -0.75573700 |
| C | -4.02275600 | -1.31821300 | 0.57786100  |
| C | -3.22093000 | -0.05731100 | 0.91933800  |
| H | -1.74618700 | -2.59336100 | -1.75227500 |
| H | -0.95173600 | -0.32189200 | -1.19160100 |
| H | 0.43629000  | -1.51111800 | 0.11697000  |
| H | -1.48757000 | -1.05587700 | 1.73296200  |
| H | -1.12493200 | 0.56088700  | 1.11034100  |
| H | -3.82227400 | -1.23788700 | -1.57605100 |
| H | -4.13269900 | -2.86570300 | -0.95304900 |
| H | -5.09719200 | -1.08413000 | 0.54588600  |
| H | -3.88404300 | -2.06074800 | 1.38138400  |
| H | -3.43829600 | 0.72943700  | 0.17933900  |
| H | -3.51420600 | 0.33701200  | 1.90326300  |
| H | -1.85366400 | -3.00982600 | -0.02878900 |
| C | -1.57608900 | 3.74601000  | -0.39239900 |
| H | -1.69275100 | 4.45132100  | 0.43527200  |
| H | -2.47710600 | 3.11996600  | -0.46967600 |
| H | -1.46709600 | 4.28241000  | -1.34352200 |
| C | -0.38872700 | 2.85062200  | -0.15363000 |
| O | 0.21294900  | 2.78194000  | 0.90560700  |
| O | -0.07960200 | 2.11841500  | -1.21506600 |
| H | 0.66538600  | 1.46005900  | -1.02108700 |

|    |            |             |            |
|----|------------|-------------|------------|
| Mn | 2.55647100 | -0.62455000 | 0.07534300 |
|----|------------|-------------|------------|

### TS2

|    |             |             |             |
|----|-------------|-------------|-------------|
| O  | 3.07182500  | -2.02597500 | -0.82177800 |
| O  | 1.11291500  | -0.20391600 | -0.75634700 |
| O  | 0.60465400  | -2.43620400 | 0.33798000  |
| O  | 2.44186000  | -0.75550500 | 1.50400900  |
| C  | -1.61856300 | 0.12249600  | 0.78032900  |
| C  | -1.47450500 | -0.39444100 | -0.61199800 |
| C  | -2.36296800 | -1.53817900 | -0.99303200 |
| C  | -3.83959400 | -1.11285900 | -0.76595600 |
| C  | -4.05086400 | -0.61976100 | 0.66932400  |
| C  | -3.09646200 | 0.52583100  | 1.02333700  |
| H  | -2.20489000 | -1.84432400 | -2.03512000 |
| H  | -1.20637400 | 0.31202600  | -1.39471800 |
| H  | -0.14708500 | -1.95932000 | -0.06877600 |
| H  | -1.35572100 | -0.66584100 | 1.50580400  |
| H  | -0.94940400 | 0.97005800  | 0.96429900  |
| H  | -4.09435900 | -0.30877700 | -1.47440600 |
| H  | -4.50084000 | -1.96285000 | -0.98963400 |
| H  | -5.09365300 | -0.29660600 | 0.80551200  |
| H  | -3.88459300 | -1.45796000 | 1.36671600  |
| H  | -3.33272300 | 1.40497000  | 0.40277300  |
| H  | -3.22404100 | 0.82984500  | 2.07249500  |
| H  | -2.17747000 | -2.41813000 | -0.35358100 |
| C  | 0.44548600  | 4.53400700  | -0.44237700 |
| H  | 0.48292000  | 5.17524000  | 0.44293800  |
| H  | -0.55348200 | 4.57825700  | -0.89778000 |
| H  | 1.16192700  | 4.89194700  | -1.19470500 |
| C  | 0.77191300  | 3.10953400  | -0.07297900 |
| O  | 1.05968400  | 2.74776600  | 1.05683300  |
| O  | 0.71356700  | 2.28730200  | -1.11019900 |
| H  | 0.92383300  | 1.32303200  | -0.85995400 |
| Mn | 1.97893000  | -1.32956300 | 0.10017100  |

### INT3

|   |             |             |             |
|---|-------------|-------------|-------------|
| O | 0.64180700  | -2.79074000 | -1.26541300 |
| O | 0.23317000  | -0.27929300 | -0.20074200 |
| O | -1.61243400 | -2.34248100 | 0.24361300  |
| O | 0.84726700  | -2.38160100 | 1.48345800  |
| C | -1.44156500 | 0.86752200  | 1.18870300  |
| C | -0.75383900 | 0.74015200  | -0.17282300 |
| C | -1.75379200 | 0.63683600  | -1.32787100 |
| C | -2.73484900 | 1.81554300  | -1.30584500 |
| C | -3.43810500 | 1.93178300  | 0.05137400  |
| C | -2.42428000 | 2.04456600  | 1.19561400  |
| H | -1.19888300 | 0.60335700  | -2.27582600 |
| H | -0.18541200 | 1.67482500  | -0.32244300 |
| H | -2.10565900 | -1.51897700 | 0.15049600  |
| H | -1.98245900 | -0.05973800 | 1.43127100  |

|    |             |             |             |
|----|-------------|-------------|-------------|
| H  | -0.67027600 | 0.99213600  | 1.96090600  |
| H  | -2.18258000 | 2.74844800  | -1.50737800 |
| H  | -3.47171400 | 1.70520900  | -2.11417700 |
| H  | -4.11512500 | 2.79863500  | 0.05570000  |
| H  | -4.06552900 | 1.03851000  | 0.21104100  |
| H  | -1.86109500 | 2.98640300  | 1.08780900  |
| H  | -2.94063400 | 2.09581600  | 2.16485900  |
| H  | -2.31917700 | -0.30586300 | -1.26538900 |
| C  | 4.32927300  | 2.09358000  | -0.25061500 |
| H  | 4.56169500  | 3.00952400  | 0.30049700  |
| H  | 4.45419500  | 2.26290600  | -1.32922100 |
| H  | 5.02845800  | 1.29569400  | 0.03575500  |
| C  | 2.91479800  | 1.65269300  | 0.03202100  |
| O  | 2.15420400  | 2.25325800  | 0.77766500  |
| O  | 2.58064400  | 0.54897100  | -0.61407300 |
| H  | 1.61558600  | 0.24571600  | -0.40499800 |
| Mn | 0.17982000  | -2.09334200 | 0.07846800  |

### TS3

|    |             |             |             |
|----|-------------|-------------|-------------|
| O  | 2.53515400  | -1.59634100 | 0.24141400  |
| O  | 0.03820100  | -0.32740700 | -0.56031600 |
| O  | 0.47285500  | -2.40320900 | -1.50944400 |
| O  | 0.19613900  | -2.68131900 | 1.27416500  |
| C  | -2.29218800 | -0.77673000 | 0.10255800  |
| C  | -1.15919000 | 0.23945100  | 0.04861900  |
| C  | -1.54979600 | 1.48919200  | -0.73252600 |
| C  | -2.81245900 | 2.12517600  | -0.13718700 |
| C  | -3.96647300 | 1.12044000  | -0.06268800 |
| C  | -3.55180900 | -0.13997600 | 0.70352800  |
| H  | -0.71905300 | 2.20591300  | -0.72624100 |
| H  | -0.84866000 | 0.51950200  | 1.06325700  |
| H  | -0.10570700 | -1.00282600 | -1.35931400 |
| H  | -2.50528700 | -1.12172000 | -0.92245600 |
| H  | -1.97594800 | -1.64980800 | 0.68586800  |
| H  | -2.58451900 | 2.49442100  | 0.87625000  |
| H  | -3.09804300 | 3.00202300  | -0.73482500 |
| H  | -4.84332700 | 1.58399500  | 0.41213900  |
| H  | -4.26867700 | 0.83923300  | -1.08526300 |
| H  | -3.35589100 | 0.12153200  | 1.75661600  |
| H  | -4.36767600 | -0.87605000 | 0.70928700  |
| H  | -1.73203600 | 1.20437000  | -1.78110900 |
| C  | 3.22660300  | 3.29163200  | 0.13260300  |
| H  | 3.25241500  | 3.89680400  | 1.04312100  |
| H  | 3.04202000  | 3.92752200  | -0.74354100 |
| H  | 4.20020100  | 2.80387600  | -0.01728100 |
| C  | 2.15782600  | 2.23974300  | 0.23840700  |
| O  | 1.49429600  | 2.02197100  | 1.23574500  |
| O  | 2.00441800  | 1.54792400  | -0.89200000 |
| H  | 1.31345600  | 0.85071100  | -0.76559500 |
| Mn | 0.97412600  | -1.95304100 | 0.06050800  |

MnO<sub>4</sub><sup>-</sup>/3AcOH

INT1

|    |             |             |             |
|----|-------------|-------------|-------------|
| O  | 2.18118500  | 2.83931900  | 0.38453900  |
| O  | 3.59252100  | 0.73329800  | -0.31486300 |
| O  | 1.10984500  | 0.47618000  | 0.40467500  |
| O  | 1.68077900  | 1.60752400  | -1.84941800 |
| H  | 1.79838600  | -4.55029600 | -0.82836500 |
| C  | 2.15233300  | -3.92627600 | -0.00295400 |
| H  | 2.98117700  | -4.41476100 | 0.52396800  |
| H  | 1.33762400  | -3.77222500 | 0.71833500  |
| C  | 2.57209700  | -2.57865800 | -0.51841300 |
| O  | 2.29290400  | -2.13901100 | -1.61761000 |
| O  | 3.28058900  | -1.88467000 | 0.37801000  |
| H  | 3.46075500  | -0.97261800 | 0.03969300  |
| C  | -1.46627200 | -1.50104600 | -1.51586100 |
| C  | -1.47822800 | 0.01829000  | -1.31939700 |
| C  | -2.72999300 | 0.65784400  | -1.92756300 |
| C  | -4.00623000 | 0.01413000  | -1.37319900 |
| C  | -4.00016600 | -1.50635400 | -1.57553000 |
| C  | -2.74525200 | -2.14561600 | -0.96871200 |
| H  | -2.72781400 | 1.73913300  | -1.73211200 |
| H  | -1.45627900 | 0.23772100  | -0.24279900 |
| H  | -0.57018300 | 0.46490200  | -1.74674200 |
| H  | -1.38226900 | -1.72576900 | -2.59268300 |
| H  | -0.57986000 | -1.93723900 | -1.03726700 |
| H  | -4.07591200 | 0.23216800  | -0.29417400 |
| H  | -4.89630500 | 0.45907900  | -1.84342200 |
| H  | -4.90559100 | -1.95393000 | -1.13892100 |
| H  | -4.02973500 | -1.72550200 | -2.65629500 |
| H  | -2.77691800 | -2.01204800 | 0.12414100  |
| H  | -2.73765100 | -3.23015000 | -1.15425700 |
| H  | -2.70806500 | 0.53172800  | -3.02366300 |
| C  | -1.53880700 | -2.93742800 | 2.71359900  |
| H  | -2.51110500 | -2.81349400 | 3.19732900  |
| H  | -0.81676800 | -3.36094800 | 3.42451400  |
| H  | -1.61948800 | -3.63829700 | 1.87197000  |
| C  | -1.03421900 | -1.61117700 | 2.21682000  |
| O  | -1.60892700 | -0.54948300 | 2.36424500  |
| O  | 0.13371300  | -1.72161900 | 1.58336400  |
| H  | 0.43058900  | -0.85180200 | 1.22071400  |
| C  | -2.55546000 | 2.61882300  | 1.43662800  |
| H  | -3.36571100 | 2.76190000  | 0.71693700  |
| H  | -2.75853300 | 3.18618500  | 2.35475200  |
| H  | -2.47299400 | 1.55923200  | 1.71416400  |
| C  | -1.25032600 | 3.06029400  | 0.83928100  |
| O  | -1.10361500 | 3.46110000  | -0.29934900 |
| O  | -0.23323800 | 2.95699600  | 1.70298600  |
| H  | 0.62070200  | 3.10735900  | 1.23291000  |
| Mn | 2.14556200  | 1.41862700  | -0.35078300 |



|     |             |             |             |
|-----|-------------|-------------|-------------|
| TS1 |             |             |             |
| O   | 0.93252100  | -3.37807000 | -0.43618400 |
| O   | -1.70528700 | -2.86674300 | -0.86178000 |
| O   | -0.22541600 | -1.27261300 | 0.61857800  |
| O   | 0.18039300  | -1.26377100 | -1.91870400 |
| H   | -4.92738800 | 1.61694100  | 0.05120600  |
| C   | -4.54754800 | 0.78243500  | 0.64769400  |
| H   | -5.37295200 | 0.24334900  | 1.12871500  |
| H   | -3.88847500 | 1.16740400  | 1.43842600  |
| C   | -3.73784100 | -0.14380000 | -0.21683600 |
| O   | -3.31083400 | 0.14322500  | -1.32073800 |
| O   | -3.51322400 | -1.32305600 | 0.36156000  |
| H   | -2.89246200 | -1.87391600 | -0.19013900 |
| C   | -0.35926200 | 1.98752200  | -1.30445000 |
| C   | 0.83079400  | 1.07778200  | -1.11532500 |
| C   | 2.01200300  | 1.41873000  | -1.99269800 |
| C   | 2.44430300  | 2.87395100  | -1.69989500 |
| C   | 1.27409800  | 3.84850900  | -1.86816400 |
| C   | 0.07203900  | 3.44232100  | -1.00992900 |
| H   | 2.84090300  | 0.72643700  | -1.80556700 |
| H   | 1.10788600  | 0.93631700  | -0.06557100 |
| H   | 0.47818400  | -0.07492900 | -1.46908500 |
| H   | -0.71436300 | 1.92469500  | -2.34484000 |
| H   | -1.19306800 | 1.69227600  | -0.66005500 |
| H   | 2.82278200  | 2.93035400  | -0.66658000 |
| H   | 3.27857500  | 3.14717400  | -2.36260800 |
| H   | 1.59376200  | 4.86917700  | -1.61005600 |
| H   | 0.97023700  | 3.86976500  | -2.92775500 |
| H   | 0.33934500  | 3.52822800  | 0.05499000  |
| H   | -0.77932300 | 4.11666000  | -1.18226900 |
| H   | 1.72900300  | 1.33608100  | -3.05412900 |
| C   | -1.16571800 | 2.90483400  | 2.80294200  |
| H   | -0.45780100 | 3.54585900  | 3.33485200  |
| H   | -1.99814000 | 2.62557700  | 3.46166300  |
| H   | -1.59314700 | 3.45044400  | 1.95009100  |
| C   | -0.47275300 | 1.66872900  | 2.29624300  |
| O   | 0.72815000  | 1.47423400  | 2.36968900  |
| O   | -1.31716100 | 0.80794100  | 1.73861800  |
| H   | -0.84108800 | 0.02404700  | 1.33480900  |
| C   | 3.67637300  | -0.39215700 | 2.18069200  |
| H   | 4.52502700  | 0.22371300  | 1.86766400  |
| H   | 3.92895100  | -0.98113300 | 3.07027500  |
| H   | 2.82842100  | 0.26319100  | 2.43178000  |
| C   | 3.23588900  | -1.27834500 | 1.05008200  |
| O   | 3.44949200  | -1.04664500 | -0.12628000 |
| O   | 2.54648100  | -2.34191900 | 1.46469200  |
| H   | 2.08988100  | -2.77824300 | 0.69754700  |
| Mn  | -0.22279700 | -2.28532800 | -0.64884400 |

## INT2

|    |             |             |             |
|----|-------------|-------------|-------------|
| O  | 0.65478700  | -3.52703600 | -0.33305400 |
| O  | -1.94139100 | -2.79321500 | -0.79596900 |
| O  | -0.30537100 | -1.26920400 | 0.59919600  |
| O  | 0.10549100  | -1.39916500 | -1.96540200 |
| H  | -4.68432100 | 2.04536500  | -0.13027900 |
| C  | -4.41479900 | 1.19331200  | 0.50024500  |
| H  | -5.30656400 | 0.76786900  | 0.97707600  |
| H  | -3.73300900 | 1.52456500  | 1.29599300  |
| C  | -3.70046100 | 0.15130300  | -0.31498900 |
| O  | -3.23903600 | 0.34273400  | -1.42574300 |
| O  | -3.60323300 | -1.01778200 | 0.31710800  |
| H  | -3.03556600 | -1.65193900 | -0.20028600 |
| C  | -0.19025000 | 2.05180800  | -1.20914600 |
| C  | 0.98908400  | 1.15299400  | -1.02725100 |
| C  | 2.17042200  | 1.43860800  | -1.89570100 |
| C  | 2.62196400  | 2.90340900  | -1.65055400 |
| C  | 1.45725800  | 3.88320400  | -1.83488000 |
| C  | 0.25603700  | 3.51565100  | -0.95668100 |
| H  | 2.98964700  | 0.73990800  | -1.69009800 |
| H  | 1.17569500  | 0.74965800  | -0.03208100 |
| H  | 0.40704600  | -0.49990800 | -1.64397900 |
| H  | -0.56086800 | 1.98217700  | -2.24557300 |
| H  | -1.01878400 | 1.77817900  | -0.54883000 |
| H  | 3.01056500  | 2.98542600  | -0.62294200 |
| H  | 3.45104300  | 3.15159600  | -2.32947200 |
| H  | 1.78915900  | 4.90735700  | -1.60839300 |
| H  | 1.14450700  | 3.87806200  | -2.89234400 |
| H  | 0.53030500  | 3.62611600  | 0.10429100  |
| H  | -0.58845700 | 4.19490100  | -1.14336500 |
| H  | 1.89421400  | 1.33991300  | -2.95976600 |
| C  | -0.97085400 | 2.89542900  | 2.90046500  |
| H  | -0.21485800 | 3.47672100  | 3.43491400  |
| H  | -1.81382600 | 2.66300900  | 3.56394100  |
| H  | -1.36799200 | 3.48386800  | 2.06153900  |
| C  | -0.36997800 | 1.62353900  | 2.36600800  |
| O  | 0.81511700  | 1.34655600  | 2.41903400  |
| O  | -1.27911300 | 0.82977600  | 1.80834300  |
| H  | -0.86066600 | 0.02603400  | 1.38407800  |
| C  | 3.69720600  | -0.56952500 | 1.96304000  |
| H  | 4.53616300  | 0.00295600  | 1.55627900  |
| H  | 4.00154400  | -1.12217700 | 2.86011500  |
| H  | 2.88873700  | 0.12102800  | 2.24712400  |
| C  | 3.14949300  | -1.49927400 | 0.91767200  |
| O  | 3.32355700  | -1.36581400 | -0.28014000 |
| O  | 2.41355600  | -2.48353400 | 1.43599400  |
| H  | 1.89851700  | -2.93984200 | 0.71966400  |
| Mn | -0.41031500 | -2.35920500 | -0.59767600 |

## TS2

|    |             |             |             |
|----|-------------|-------------|-------------|
| O  | -1.42277500 | -3.15825200 | 0.17736200  |
| O  | 1.30340000  | -3.15404200 | 0.59479400  |
| O  | 0.04634600  | -1.02770800 | -0.36757100 |
| O  | -0.32935500 | -1.48504600 | 2.07554900  |
| H  | 4.52015100  | 1.33354800  | 0.10757600  |
| C  | 4.21827400  | 0.50494000  | -0.53885000 |
| H  | 5.09448000  | 0.08274100  | -1.04855300 |
| H  | 3.52599600  | 0.86050700  | -1.31457500 |
| C  | 3.52952300  | -0.56128300 | 0.26837600  |
| O  | 3.29302800  | -0.48007200 | 1.46047600  |
| O  | 3.18946800  | -1.61685100 | -0.46813700 |
| H  | 2.58670900  | -2.22407600 | 0.04443500  |
| C  | 0.87601900  | 1.83649700  | 0.87119200  |
| C  | -0.50488200 | 1.28293000  | 0.94773000  |
| C  | -1.29656300 | 1.62760800  | 2.16813700  |
| C  | -1.37480300 | 3.17574500  | 2.27496800  |
| C  | 0.02484900  | 3.79786700  | 2.25265500  |
| C  | 0.80879800  | 3.38116700  | 1.00439600  |
| H  | -2.29927800 | 1.18770100  | 2.12553600  |
| H  | -1.04203700 | 1.12967700  | 0.01568600  |
| H  | -0.35586900 | -0.53331900 | 1.81203400  |
| H  | 1.49362600  | 1.44171900  | 1.69247900  |
| H  | 1.36687500  | 1.55802200  | -0.06615500 |
| H  | -1.96486000 | 3.56249300  | 1.42924100  |
| H  | -1.91196700 | 3.44756000  | 3.19528200  |
| H  | -0.04997600 | 4.89441200  | 2.30107700  |
| H  | 0.57698700  | 3.47681900  | 3.15160600  |
| H  | 0.31828300  | 3.79336400  | 0.10839000  |
| H  | 1.83012000  | 3.78752400  | 1.02827500  |
| H  | -0.79716300 | 1.25973500  | 3.08038800  |
| C  | 1.05869800  | 2.14380200  | -3.80762100 |
| H  | 0.38345600  | 2.90107400  | -4.21523500 |
| H  | 1.45657600  | 1.51404500  | -4.61436900 |
| H  | 1.91587300  | 2.63124500  | -3.32201100 |
| C  | 0.33877200  | 1.29136500  | -2.79732700 |
| O  | -0.80379600 | 1.48938700  | -2.42237700 |
| O  | 1.09294300  | 0.29505800  | -2.34446700 |
| H  | 0.62889500  | -0.22972200 | -1.62560100 |
| C  | -3.99713800 | 0.59878500  | -1.50159500 |
| H  | -4.61545700 | 1.30426700  | -0.93920800 |
| H  | -4.56054200 | 0.17866300  | -2.34445100 |
| H  | -3.11781800 | 1.11641000  | -1.91176000 |
| C  | -3.50515600 | -0.49614000 | -0.59699000 |
| O  | -3.56567100 | -0.46329700 | 0.61961100  |
| O  | -2.96456500 | -1.51115200 | -1.26900900 |
| H  | -2.49994400 | -2.13922500 | -0.65065400 |
| Mn | -0.09014600 | -2.35756400 | 0.56961200  |

INT3

|   |            |             |             |
|---|------------|-------------|-------------|
| O | 0.78431600 | -0.52014900 | -2.37389700 |
|---|------------|-------------|-------------|

|     |             |             |             |
|-----|-------------|-------------|-------------|
| O   | -1.08346400 | -2.20729200 | -1.26100200 |
| O   | -0.28239700 | -0.09047500 | 0.19479400  |
| O   | -1.87968500 | 0.28575100  | -2.10619400 |
| H   | -5.82829300 | -0.77540700 | 1.18762800  |
| C   | -4.97716500 | -1.40969600 | 1.45056000  |
| H   | -5.30501900 | -2.44031600 | 1.63550400  |
| H   | -4.51711300 | -1.03882000 | 2.37791200  |
| C   | -3.94576800 | -1.37711100 | 0.35784000  |
| O   | -3.98533600 | -0.58186000 | -0.57501800 |
| O   | -2.99217100 | -2.27505800 | 0.51471500  |
| H   | -2.27881900 | -2.22498100 | -0.20383700 |
| C   | -1.75301900 | 1.68549200  | 0.98084600  |
| C   | -0.32416500 | 1.26842900  | 0.63992200  |
| C   | 0.33267700  | 2.23741900  | -0.34033600 |
| C   | 0.30614700  | 3.66471200  | 0.21846200  |
| C   | -1.12103300 | 4.10258800  | 0.56635800  |
| C   | -1.78338300 | 3.11537700  | 1.53410600  |
| H   | 1.35960300  | 1.91158700  | -0.54436500 |
| H   | 0.27633400  | 1.26589000  | 1.56403600  |
| H   | -2.69282800 | 0.02959000  | -1.60843400 |
| H   | -2.36453800 | 1.62493900  | 0.07082900  |
| H   | -2.17281900 | 0.97580800  | 1.70681600  |
| H   | 0.93140900  | 3.71060900  | 1.12571300  |
| H   | 0.75569100  | 4.35673800  | -0.50794900 |
| H   | -1.11587600 | 5.11427400  | 0.99825000  |
| H   | -1.71707400 | 4.15435700  | -0.36011500 |
| H   | -1.25117700 | 3.14331700  | 2.49947300  |
| H   | -2.82148000 | 3.41365000  | 1.73918600  |
| H   | -0.22008600 | 2.20704200  | -1.29096600 |
| C   | 3.15343500  | -2.26150800 | 2.67756500  |
| H   | 3.94448700  | -1.77447300 | 3.25476200  |
| H   | 3.60314100  | -2.84249900 | 1.85937700  |
| H   | 2.59368400  | -2.96271500 | 3.30916200  |
| C   | 2.22809400  | -1.23183500 | 2.08563600  |
| O   | 2.46727700  | -0.03534500 | 2.06304900  |
| O   | 1.12570500  | -1.76303800 | 1.57445200  |
| H   | 0.57979400  | -1.06987000 | 1.08102000  |
| C   | 5.09126400  | -0.24057400 | -0.12918000 |
| H   | 5.85194300  | 0.53494200  | -0.25843000 |
| H   | 5.49404700  | -1.22597300 | -0.39273300 |
| H   | 4.78142900  | -0.27172300 | 0.92480700  |
| C   | 3.87826300  | 0.07933700  | -0.96039800 |
| O   | 3.64048100  | 1.17942200  | -1.42947700 |
| O   | 3.07428500  | -0.96719000 | -1.12039700 |
| H   | 2.24127000  | -0.72210400 | -1.61971100 |
| Mn  | -0.54367500 | -0.68351100 | -1.47537700 |
| TS3 |             |             |             |
| O   | 1.03165900  | -0.26192600 | -2.54216200 |
| O   | -1.61704100 | -0.37253300 | -1.68257400 |

|    |             |             |             |
|----|-------------|-------------|-------------|
| O  | 0.27900700  | 1.17144100  | -0.10348000 |
| O  | -0.37322900 | 2.14636300  | -2.06129300 |
| H  | -5.89147100 | 1.62160300  | 1.19428300  |
| C  | -5.42811800 | 0.64383500  | 1.03343200  |
| H  | -6.16824200 | -0.07715800 | 0.66382600  |
| H  | -5.04480500 | 0.26179100  | 1.99101500  |
| C  | -4.27776600 | 0.76242500  | 0.06867500  |
| O  | -3.77762900 | 1.82105900  | -0.27109600 |
| O  | -3.85211900 | -0.41769600 | -0.36710100 |
| H  | -3.00682600 | -0.31917100 | -0.90532900 |
| C  | 1.62809500  | 1.53106000  | 1.87145300  |
| C  | 1.62789100  | 1.01276300  | 0.43782100  |
| C  | 2.65939100  | 1.72637900  | -0.42522000 |
| C  | 4.05635900  | 1.57532400  | 0.19056100  |
| C  | 4.09171600  | 2.08160100  | 1.63623000  |
| C  | 3.02543700  | 1.38693300  | 2.48889800  |
| H  | 2.63846500  | 1.31368000  | -1.44063900 |
| H  | 1.82107500  | -0.06471500 | 0.42968100  |
| H  | 0.07902800  | 2.05708700  | -0.74410500 |
| H  | 1.32545100  | 2.59017500  | 1.86650700  |
| H  | 0.88981400  | 0.97998000  | 2.46748100  |
| H  | 4.33899600  | 0.51094800  | 0.16935700  |
| H  | 4.79040200  | 2.11279900  | -0.42593300 |
| H  | 5.08882700  | 1.92197000  | 2.07167700  |
| H  | 3.91043700  | 3.16935500  | 1.64466300  |
| H  | 3.26877000  | 0.31536100  | 2.57388500  |
| H  | 3.01897300  | 1.79171400  | 3.51053100  |
| H  | 2.39452300  | 2.79424300  | -0.49138300 |
| C  | -2.43494300 | -1.77231500 | 2.62383900  |
| H  | -2.12557800 | -2.77641600 | 2.92658800  |
| H  | -3.33020700 | -1.83703400 | 1.98934300  |
| H  | -2.69346300 | -1.16665700 | 3.50148100  |
| C  | -1.34587000 | -1.10869600 | 1.82892700  |
| O  | -0.36623300 | -1.67789100 | 1.38462600  |
| O  | -1.57408700 | 0.19188300  | 1.63853000  |
| H  | -0.89480800 | 0.56715900  | 1.02456000  |
| C  | 1.80637900  | -4.15118700 | 0.23306400  |
| H  | 2.66769500  | -4.37607400 | 0.86892800  |
| H  | 1.61000100  | -4.97792400 | -0.46024700 |
| H  | 0.91479500  | -4.01618600 | 0.86226100  |
| C  | 2.03178500  | -2.86609900 | -0.51441600 |
| O  | 2.87239900  | -2.03636300 | -0.21138800 |
| O  | 1.19866600  | -2.71485400 | -1.53935500 |
| H  | 1.25253900  | -1.79305800 | -1.92877000 |
| Mn | -0.24270700 | 0.46674000  | -1.84627600 |

**MnO<sub>4</sub><sup>-</sup>/(CaOTf)<sup>+</sup>**

INT1

|   |             |            |            |
|---|-------------|------------|------------|
| C | 0.15745400  | 3.46301300 | 1.09043300 |
| C | -0.36743800 | 2.18271500 | 0.43276400 |

|    |             |             |             |
|----|-------------|-------------|-------------|
| C  | -0.35552200 | 2.28767100  | -1.09457800 |
| C  | 1.03477100  | 2.66178100  | -1.62099500 |
| C  | 1.55989500  | 3.94266300  | -0.96147500 |
| C  | 1.55182800  | 3.82807700  | 0.56793400  |
| H  | -0.68596200 | 1.33981100  | -1.54092900 |
| H  | 0.26471400  | 1.33574200  | 0.73608000  |
| H  | -1.38363400 | 1.96054300  | 0.78543500  |
| H  | -0.53769300 | 4.29180800  | 0.87280800  |
| H  | 0.17610300  | 3.34866700  | 2.18469400  |
| H  | 1.72544400  | 1.83264600  | -1.40550100 |
| H  | 1.00924500  | 2.77788600  | -2.71521100 |
| H  | 2.57497900  | 4.16825400  | -1.32168300 |
| H  | 0.92301900  | 4.79255000  | -1.26079500 |
| H  | 2.26529900  | 3.04424600  | 0.87318200  |
| H  | 1.89784700  | 4.76810700  | 1.02390500  |
| H  | -1.08380800 | 3.05389100  | -1.40964500 |
| Mn | -3.34793300 | -0.32492500 | 0.21424300  |
| O  | -3.07369000 | -1.08228500 | -1.18089100 |
| O  | -4.59473900 | -0.94582400 | 0.95141200  |
| O  | -3.57336900 | 1.21483300  | -0.02535600 |
| O  | -2.00420200 | -0.56143500 | 1.07741800  |
| Ca | -0.84983800 | -1.91437300 | -0.54297200 |
| C  | 2.78442700  | -0.74751800 | 0.94989400  |
| S  | 2.16316400  | -1.66410900 | -0.57394800 |
| F  | 1.76592300  | -0.48851600 | 1.77014600  |
| F  | 3.35562800  | 0.39961600  | 0.58748000  |
| F  | 3.67832300  | -1.49901800 | 1.59091100  |
| O  | 1.16919800  | -0.71705100 | -1.18859600 |
| O  | 3.36604400  | -1.96353200 | -1.35904500 |
| O  | 1.40420100  | -2.83182900 | -0.00700600 |

#### TS1

|   |             |            |             |
|---|-------------|------------|-------------|
| C | 0.40818200  | 3.12281000 | -0.86403300 |
| C | 0.38374800  | 2.00173400 | 0.14763700  |
| C | -0.04367000 | 2.41962700 | 1.53567400  |
| C | -1.44657300 | 3.06375200 | 1.45831000  |
| C | -1.47482100 | 4.21233600 | 0.44525700  |
| C | -0.99808500 | 3.76088000 | -0.93864100 |
| H | -0.06065600 | 1.55532100 | 2.21153300  |
| H | -0.15003900 | 1.11646000 | -0.20589200 |
| H | 1.54237600  | 1.60186300 | 0.27049500  |
| H | 1.13397000  | 3.89255500 | -0.55780300 |
| H | 0.71374000  | 2.75321800 | -1.85188900 |
| H | -2.17449800 | 2.29315300 | 1.16303200  |
| H | -1.73901100 | 3.41737900 | 2.45777300  |
| H | -2.49168200 | 4.62670700 | 0.37528100  |
| H | -0.82459500 | 5.02750700 | 0.80354400  |
| H | -1.70420300 | 3.02042600 | -1.34669100 |
| H | -0.97676800 | 4.60773100 | -1.63995500 |
| H | 0.66633200  | 3.15543200 | 1.94458600  |

|    |             |             |             |
|----|-------------|-------------|-------------|
| Mn | 3.09277500  | -0.27548800 | -0.19244200 |
| O  | 3.17040000  | -1.43094200 | 0.93350900  |
| O  | 4.28523400  | -0.19087800 | -1.22264400 |
| O  | 2.80439100  | 1.21129900  | 0.50700000  |
| O  | 1.66978400  | -0.57917700 | -0.96410900 |
| Ca | 0.94870400  | -2.29806000 | 0.44432200  |
| C  | -2.58913500 | -0.66168500 | -0.93576500 |
| S  | -2.03843600 | -1.69424000 | 0.54088000  |
| F  | -1.54862500 | -0.40998200 | -1.72965900 |
| F  | -3.10522600 | 0.49335700  | -0.51568400 |
| F  | -3.51407400 | -1.32634300 | -1.62689300 |
| O  | -0.94403200 | -0.88079800 | 1.17289900  |
| O  | -3.25565700 | -1.89757300 | 1.33661200  |
| O  | -1.42261900 | -2.91212100 | -0.08752000 |

INT2

|    |             |             |             |
|----|-------------|-------------|-------------|
| C  | 0.03779000  | 3.16409200  | 0.92528300  |
| C  | -0.02829900 | 2.03571600  | -0.04949700 |
| C  | 0.32946600  | 2.35416900  | -1.46404600 |
| C  | 1.76188600  | 2.95095400  | -1.49278100 |
| C  | 1.88444500  | 4.13628300  | -0.52916400 |
| C  | 1.47143900  | 3.76000700  | 0.89793600  |
| H  | 0.27392800  | 1.46216400  | -2.09887700 |
| H  | 0.17339300  | 1.02995400  | 0.31228800  |
| H  | -1.78688600 | 1.70768900  | -0.26866500 |
| H  | -0.66752700 | 3.96167000  | 0.63552800  |
| H  | -0.22470600 | 2.83795900  | 1.93990100  |
| H  | 2.47691400  | 2.16508300  | -1.20604800 |
| H  | 2.00914000  | 3.25554300  | -2.52008200 |
| H  | 2.91695800  | 4.51577900  | -0.53174000 |
| H  | 1.24325000  | 4.95966500  | -0.88553900 |
| H  | 2.17334200  | 3.01214700  | 1.29883100  |
| H  | 1.51613900  | 4.63591100  | 1.56129300  |
| H  | -0.36203600 | 3.11073600  | -1.87230800 |
| Mn | -3.17735600 | -0.05127700 | 0.19338900  |
| O  | -3.29192400 | -1.15659900 | -0.97756900 |
| O  | -4.36171200 | 0.09006600  | 1.22344400  |
| O  | -2.75257700 | 1.50367000  | -0.46389600 |
| O  | -1.76748800 | -0.44883100 | 0.95275900  |
| Ca | -1.14127800 | -2.17015800 | -0.49248500 |
| C  | 2.50315400  | -0.91347800 | 0.96164500  |
| S  | 1.87143300  | -1.84812700 | -0.54723600 |
| F  | 1.48812700  | -0.62923400 | 1.77768400  |
| F  | 3.08669300  | 0.22230400  | 0.58019400  |
| F  | 3.39033100  | -1.66282600 | 1.61399900  |
| O  | 0.85016800  | -0.92097100 | -1.14782800 |
| O  | 3.06675900  | -2.12586400 | -1.35264900 |
| O  | 1.14789300  | -3.02870100 | 0.03611700  |

TS2

|    |             |             |             |
|----|-------------|-------------|-------------|
| C  | 1.52922200  | 2.69438600  | -0.84852300 |
| C  | 0.63117700  | 1.78896100  | -0.08070900 |
| C  | 0.11923700  | 2.29479700  | 1.22740400  |
| C  | -0.64440400 | 3.62299400  | 0.95862200  |
| C  | 0.24129100  | 4.62114300  | 0.20739200  |
| C  | 0.77820100  | 4.03206300  | -1.10075400 |
| H  | -0.53372300 | 1.56024600  | 1.71160200  |
| H  | -0.00260100 | 1.10635900  | -0.63878900 |
| H  | 1.91465900  | 0.76882100  | 0.91711000  |
| H  | 2.43768100  | 2.91883500  | -0.26547700 |
| H  | 1.84109000  | 2.23924500  | -1.79567900 |
| H  | -1.54467700 | 3.40339600  | 0.36495200  |
| H  | -0.98251500 | 4.03904700  | 1.91836800  |
| H  | -0.32532400 | 5.54041900  | -0.00155300 |
| H  | 1.08871100  | 4.90953900  | 0.85103400  |
| H  | -0.05909100 | 3.84427800  | -1.79112300 |
| H  | 1.45707100  | 4.73771400  | -1.60040500 |
| H  | 0.95002000  | 2.52518000  | 1.91486500  |
| Mn | 2.98589800  | -1.01794400 | 0.11854200  |
| O  | 2.44507200  | -2.45442700 | 0.62665800  |
| O  | 4.43306700  | -0.87663200 | -0.48829800 |
| O  | 2.66076900  | 0.23576900  | 1.29572300  |
| O  | 1.82137400  | -0.53734700 | -0.96464800 |
| Ca | 0.36939300  | -2.31133700 | -0.58996700 |
| C  | -3.06690800 | 0.08028000  | -0.43531300 |
| S  | -2.34402400 | -1.41431400 | 0.45224800  |
| F  | -2.27061800 | 0.44317800  | -1.44204500 |
| F  | -3.18077400 | 1.09795000  | 0.41734900  |
| F  | -4.26998300 | -0.22091500 | -0.92038100 |
| O  | -1.00446000 | -0.93767700 | 0.93946100  |
| O  | -3.33678100 | -1.75847100 | 1.47801800  |
| O  | -2.11988500 | -2.41851400 | -0.64292800 |

### INT3

|   |             |             |             |
|---|-------------|-------------|-------------|
| C | 2.45876600  | 1.80426000  | -0.88455400 |
| C | 1.19922200  | 1.09470700  | -0.39674300 |
| C | 0.74237900  | 1.63295500  | 0.95770700  |
| C | 0.49003100  | 3.14326000  | 0.87506600  |
| C | 1.73264900  | 3.88566600  | 0.37098800  |
| C | 2.21884100  | 3.31716100  | -0.96720700 |
| H | -0.15645200 | 1.09436700  | 1.28029800  |
| H | 0.39882100  | 1.28847400  | -1.12882600 |
| H | 2.37587000  | -0.29351600 | 2.16256500  |
| H | 3.28110400  | 1.59863200  | -0.18218200 |
| H | 2.75391100  | 1.39923000  | -1.86107800 |
| H | -0.35252400 | 3.33079300  | 0.19018700  |
| H | 0.18518600  | 3.52337200  | 1.86000000  |
| H | 1.52016700  | 4.95993400  | 0.27178100  |
| H | 2.53783500  | 3.78825400  | 1.11809900  |
| H | 1.46363500  | 3.52059200  | -1.74425800 |



|    |             |             |             |
|----|-------------|-------------|-------------|
| H  | 3.14201700  | 3.82095500  | -1.28641100 |
| H  | 1.53122600  | 1.44720700  | 1.70342200  |
| Mn | 2.77935200  | -1.32176900 | 0.09763600  |
| O  | 1.96930900  | -2.75417200 | 0.07518000  |
| O  | 3.97204700  | -1.13423800 | -0.91465800 |
| O  | 3.12839500  | -0.73170800 | 1.73923800  |
| O  | 1.32901300  | -0.33011600 | -0.38584900 |
| Ca | -0.19627500 | -2.07124600 | -0.46879500 |
| C  | -3.16158600 | 0.87415100  | -0.25529300 |
| S  | -2.92676000 | -0.91976300 | 0.26480500  |
| F  | -2.10592700 | 1.28742200  | -0.95760600 |
| F  | -3.29345500 | 1.64412200  | 0.82415600  |
| F  | -4.25450400 | 0.98611100  | -1.00891200 |
| O  | -1.68342700 | -0.89033200 | 1.11078200  |
| O  | -4.17753300 | -1.28353200 | 0.94316800  |
| O  | -2.61377500 | -1.63400200 | -1.01836200 |

TS3

|    |             |             |             |
|----|-------------|-------------|-------------|
| C  | -2.59102900 | 1.92484700  | 0.19299200  |
| C  | -1.30396400 | 1.17662500  | -0.12462100 |
| C  | -0.48369200 | 1.88286800  | -1.19765200 |
| C  | -0.16455800 | 3.31960600  | -0.76471900 |
| C  | -1.43870600 | 4.09887400  | -0.42443500 |
| C  | -2.27360200 | 3.36155400  | 0.62785300  |
| H  | 0.43690800  | 1.32021100  | -1.39193200 |
| H  | -0.70737800 | 1.06859000  | 0.79047400  |
| H  | -2.45973700 | -0.36804400 | -1.22930400 |
| H  | -3.22678300 | 1.93719800  | -0.70650800 |
| H  | -3.14584600 | 1.39877500  | 0.98049200  |
| H  | 0.49347900  | 3.29156500  | 0.11838900  |
| H  | 0.39927000  | 3.82404700  | -1.56145900 |
| H  | -1.18305500 | 5.10641200  | -0.06654700 |
| H  | -2.04027400 | 4.22802500  | -1.33924300 |
| H  | -1.71773800 | 3.33317500  | 1.57941900  |
| H  | -3.21074300 | 3.89918100  | 0.82692000  |
| H  | -1.06796700 | 1.89404400  | -2.13150300 |
| Mn | -2.79094000 | -1.44147100 | 0.38356000  |
| O  | -1.67507300 | -2.67040100 | 0.43835800  |
| O  | -3.54181400 | -1.00686300 | 1.70912000  |
| O  | -3.54955100 | -1.19855100 | -1.11109900 |
| O  | -1.56591400 | -0.18623200 | -0.57124500 |
| Ca | 0.16375900  | -2.00295100 | -0.72583800 |
| C  | 3.00000700  | 0.70286400  | 0.75037400  |
| S  | 2.96243400  | -0.87162000 | -0.28156300 |
| F  | 1.77173700  | 0.99620700  | 1.17957100  |
| F  | 3.45633200  | 1.71504600  | 0.01433900  |
| F  | 3.79746200  | 0.53158600  | 1.80310400  |
| O  | 2.05689400  | -0.53683900 | -1.43386700 |
| O  | 4.36832200  | -1.14574000 | -0.60402400 |
| O  | 2.26122700  | -1.86542800 | 0.60171900  |

**MnO<sub>4</sub><sup>-</sup>/(CaOTf)<sup>+</sup>/AcOH**

INT1

|    |             |             |             |
|----|-------------|-------------|-------------|
| C  | -0.51730100 | 1.76705500  | 0.81204300  |
| C  | -0.84066100 | 2.16863700  | -0.62849100 |
| C  | -1.74392000 | 3.40445300  | -0.67526200 |
| C  | -1.13327900 | 4.57255000  | 0.10889300  |
| C  | -0.80853800 | 4.16959300  | 1.55293200  |
| C  | 0.09346500  | 2.93061200  | 1.59869000  |
| H  | -1.93239900 | 3.70127100  | -1.71815800 |
| H  | 0.10279000  | 2.37745800  | -1.15577200 |
| H  | -1.31583400 | 1.32676500  | -1.14952900 |
| H  | -1.44301700 | 1.43961600  | 1.31241500  |
| H  | 0.16497000  | 0.91089400  | 0.81220400  |
| H  | -0.20344000 | 4.89375500  | -0.39093400 |
| H  | -1.81233900 | 5.43861100  | 0.09830500  |
| H  | -0.33644500 | 5.00838100  | 2.08663200  |
| H  | -1.75018000 | 3.94703700  | 2.08354800  |
| H  | 1.07550300  | 3.18110400  | 1.16400400  |
| H  | 0.27833100  | 2.62931300  | 2.64063600  |
| H  | -2.72347600 | 3.14684400  | -0.23983100 |
| Mn | -3.42384300 | -0.85162400 | -0.31447900 |
| O  | -4.09418400 | -0.90446900 | 1.11062500  |
| O  | -1.79565100 | -1.04499000 | -0.13715100 |
| O  | -3.69906800 | 0.54736600  | -0.98653200 |
| O  | -3.99083200 | -2.00404900 | -1.23055900 |
| Ca | -0.13580700 | -2.02982600 | -1.43018500 |
| H  | 1.51822400  | -1.54211600 | 3.62961200  |
| C  | 1.29641400  | -2.44482300 | 3.04697700  |
| H  | 0.75236800  | -3.13714800 | 3.70522800  |
| H  | 2.21869900  | -2.91466900 | 2.69680600  |
| C  | 0.42071100  | -2.09606800 | 1.88570200  |
| O  | 0.65124700  | -2.46424400 | 0.73289600  |
| O  | -0.62761400 | -1.36600900 | 2.19581200  |
| H  | -1.15889100 | -1.17090700 | 1.37000700  |
| C  | 3.41361500  | -0.17011500 | 0.32977900  |
| S  | 2.72972400  | 0.26343100  | -1.37287300 |
| F  | 3.57779800  | -1.48924300 | 0.44641200  |
| F  | 2.58316600  | 0.24459300  | 1.29159900  |
| F  | 4.59727300  | 0.42425200  | 0.50256200  |
| O  | 1.34462300  | -0.31835200 | -1.32400500 |
| O  | 2.74121800  | 1.73839500  | -1.40519400 |
| O  | 3.63208200  | -0.43261600 | -2.31417500 |

TS1

|   |             |            |             |
|---|-------------|------------|-------------|
| C | -0.43793400 | 1.99571100 | 1.48672900  |
| C | -0.77434500 | 2.13888900 | 0.01970300  |
| C | -0.84462300 | 3.57199000 | -0.46284800 |
| C | 0.49223200  | 4.28448500 | -0.16043300 |
| C | 0.84010400  | 4.18647000 | 1.32777500  |

|    |             |             |             |
|----|-------------|-------------|-------------|
| C  | 0.88805000  | 2.72849300  | 1.79146900  |
| H  | -1.06470400 | 3.61097700  | -1.53831500 |
| H  | -0.16327300 | 1.49472400  | -0.62068800 |
| H  | -1.90665400 | 1.70421900  | -0.13423700 |
| H  | -1.23954700 | 2.44065200  | 2.09770800  |
| H  | -0.36005500 | 0.93883800  | 1.76525900  |
| H  | 1.28984500  | 3.81019600  | -0.75148900 |
| H  | 0.42409600  | 5.33496800  | -0.47933900 |
| H  | 1.80792000  | 4.67315200  | 1.52062700  |
| H  | 0.08613600  | 4.73530600  | 1.91625600  |
| H  | 1.70550200  | 2.21176800  | 1.27008100  |
| H  | 1.09583200  | 2.66479900  | 2.86949600  |
| H  | -1.65664400 | 4.10227200  | 0.05961700  |
| Mn | -3.46482300 | -0.23492000 | -0.27585100 |
| O  | -4.27878700 | -0.67264500 | 1.00257500  |
| O  | -1.87839400 | -0.78729200 | -0.14103200 |
| O  | -3.22539400 | 1.41552300  | -0.26139400 |
| O  | -4.06752600 | -0.68291200 | -1.66447300 |
| Ca | -0.55267200 | -1.94948100 | -1.58833500 |
| H  | 1.42111700  | -2.31338900 | 3.24332700  |
| C  | 0.82859500  | -3.10240500 | 2.76012000  |
| H  | 0.15422200  | -3.51703200 | 3.52068400  |
| H  | 1.49156800  | -3.87861200 | 2.36983900  |
| C  | 0.02701300  | -2.49470100 | 1.65113000  |
| O  | 0.19033800  | -2.79622900 | 0.46442700  |
| O  | -0.85680800 | -1.60868400 | 2.03619400  |
| H  | -1.33997200 | -1.22723200 | 1.21932900  |
| C  | 3.08145400  | -0.65382200 | 0.28206200  |
| S  | 2.51567600  | 0.06580400  | -1.36654900 |
| F  | 3.16244700  | -1.98337000 | 0.20912700  |
| F  | 2.22104300  | -0.33034900 | 1.25279900  |
| F  | 4.28468100  | -0.16858600 | 0.59777200  |
| O  | 1.07856000  | -0.37543400 | -1.43037300 |
| O  | 2.66279500  | 1.52456500  | -1.20139400 |
| O  | 3.38284300  | -0.58761100 | -2.36852000 |

## INT2

|   |             |            |             |
|---|-------------|------------|-------------|
| C | -0.21951100 | 2.05408300 | 1.46919300  |
| C | -0.42326700 | 2.16442800 | -0.00497400 |
| C | -0.41576800 | 3.54403000 | -0.57836700 |
| C | 0.91772600  | 4.24106100 | -0.19531200 |
| C | 1.14011400  | 4.20006000 | 1.31991600  |
| C | 1.10413200  | 2.76611200 | 1.85646000  |
| H | -0.54153600 | 3.52747200 | -1.66876600 |
| H | -0.08844500 | 1.33914800 | -0.62941800 |
| H | -2.16791300 | 1.79864800 | -0.21210500 |
| H | -1.04436900 | 2.55576500 | 2.00420700  |
| H | -0.20211700 | 1.00803400 | 1.79283300  |
| H | 1.74322100  | 3.71942500 | -0.70069700 |
| H | 0.90350700  | 5.27777300 | -0.56196200 |

|    |             |             |             |
|----|-------------|-------------|-------------|
| H  | 2.10434600  | 4.66746600  | 1.56893700  |
| H  | 0.35952600  | 4.79745200  | 1.81985300  |
| H  | 1.94487500  | 2.19797800  | 1.43420000  |
| H  | 1.21587400  | 2.75252900  | 2.95023200  |
| H  | -1.24240400 | 4.13953000  | -0.15416200 |
| Mn | -3.49815800 | -0.05776800 | -0.29122900 |
| O  | -4.29549800 | -0.43947900 | 1.01376300  |
| O  | -1.90909000 | -0.61914400 | -0.16740100 |
| O  | -3.16129400 | 1.65515200  | -0.29027400 |
| O  | -4.11515400 | -0.47698000 | -1.68163400 |
| Ca | -0.69600900 | -1.97464100 | -1.53300500 |
| H  | 1.26136800  | -2.32200300 | 3.27406200  |
| C  | 0.54637800  | -3.05352500 | 2.87184200  |
| H  | -0.16092800 | -3.29622800 | 3.67492500  |
| H  | 1.08169700  | -3.94786200 | 2.54295100  |
| C  | -0.18019700 | -2.42768700 | 1.72211000  |
| O  | -0.02891200 | -2.80114800 | 0.55357700  |
| O  | -0.97761300 | -1.44297800 | 2.04866800  |
| H  | -1.41288400 | -1.05277800 | 1.20696700  |
| C  | 2.99430900  | -0.83247300 | 0.27654100  |
| S  | 2.49039800  | -0.12470400 | -1.39676900 |
| F  | 2.98479200  | -2.16617900 | 0.24318700  |
| F  | 2.15068400  | -0.42237600 | 1.22935300  |
| F  | 4.22539000  | -0.42110200 | 0.58922400  |
| O  | 1.03005000  | -0.48228600 | -1.46933600 |
| O  | 2.72187900  | 1.32641300  | -1.26611900 |
| O  | 3.32846300  | -0.85451100 | -2.37040200 |

## TS2

|    |             |             |             |
|----|-------------|-------------|-------------|
| C  | -0.68968800 | 2.06199600  | 1.46600500  |
| C  | -0.45045600 | 1.84947000  | 0.01503800  |
| C  | -0.40694500 | 3.06223500  | -0.84977800 |
| C  | 0.72401800  | 3.98703900  | -0.30689100 |
| C  | 0.51904700  | 4.28535600  | 1.18038500  |
| C  | 0.42903100  | 2.99968700  | 2.00633200  |
| H  | -0.21836200 | 2.80469700  | -1.89890700 |
| H  | 0.14138100  | 0.99492200  | -0.29114400 |
| H  | -2.31227100 | 1.64303100  | -0.52894800 |
| H  | -1.65903700 | 2.56001000  | 1.62913100  |
| H  | -0.69402700 | 1.11786500  | 2.01968000  |
| H  | 1.68764400  | 3.48234000  | -0.45974700 |
| H  | 0.73390700  | 4.91320700  | -0.89910800 |
| H  | 1.34506200  | 4.90941500  | 1.55196500  |
| H  | -0.40592600 | 4.87006500  | 1.31363900  |
| H  | 1.38918900  | 2.46440800  | 1.96306000  |
| H  | 0.22637400  | 3.22055600  | 3.06368500  |
| H  | -1.35129600 | 3.62767200  | -0.79545600 |
| Mn | -3.49740900 | -0.23773900 | -0.33238800 |
| O  | -4.18653400 | -0.48710700 | 1.06237900  |
| O  | -1.82080500 | -0.54318500 | -0.20998700 |

|    |             |             |             |
|----|-------------|-------------|-------------|
| O  | -3.28659300 | 1.48695400  | -0.59862100 |
| O  | -4.09558200 | -0.92084000 | -1.62390300 |
| Ca | -0.55589500 | -1.85939700 | -1.56711300 |
| H  | 1.20788800  | -2.23015000 | 3.35252900  |
| C  | 0.61028900  | -2.99470700 | 2.83762500  |
| H  | -0.12999800 | -3.36950100 | 3.55675100  |
| H  | 1.25697600  | -3.80659100 | 2.49582100  |
| C  | -0.09343400 | -2.36206300 | 1.67729900  |
| O  | 0.11055400  | -2.70420400 | 0.50643800  |
| O  | -0.93480200 | -1.41378900 | 1.99624000  |
| H  | -1.35710300 | -1.01774500 | 1.14368700  |
| C  | 3.02633200  | -0.58004500 | 0.45255100  |
| S  | 2.72172300  | -0.08376800 | -1.34060700 |
| F  | 3.08962900  | -1.90671600 | 0.56868400  |
| F  | 2.03903900  | -0.12767700 | 1.23427500  |
| F  | 4.17895200  | -0.05646000 | 0.87492900  |
| O  | 1.32390600  | -0.58641800 | -1.58372900 |
| O  | 2.80957200  | 1.38920000  | -1.32875700 |
| O  | 3.75121100  | -0.81419200 | -2.10598000 |

### INT3

|    |             |             |             |
|----|-------------|-------------|-------------|
| C  | -1.90737700 | 1.72285600  | 1.49118000  |
| C  | -1.01265900 | 1.25601800  | 0.34716500  |
| C  | -1.00450400 | 2.23526200  | -0.82178900 |
| C  | -0.57611600 | 3.62750200  | -0.34094600 |
| C  | -1.45988500 | 4.12055900  | 0.80952300  |
| C  | -1.47819000 | 3.11613100  | 1.96699100  |
| H  | -0.32218800 | 1.87069000  | -1.59820800 |
| H  | 0.01859000  | 1.19293400  | 0.72427800  |
| H  | -3.48665600 | 1.23819100  | -1.22647000 |
| H  | -2.95162800 | 1.75622000  | 1.14709800  |
| H  | -1.86141900 | 0.99843600  | 2.31498900  |
| H  | 0.47211500  | 3.57596700  | -0.00882600 |
| H  | -0.60620700 | 4.33274900  | -1.18292800 |
| H  | -1.10948500 | 5.10060700  | 1.16346200  |
| H  | -2.48899100 | 4.26502700  | 0.44061300  |
| H  | -0.47066800 | 3.05159700  | 2.40914200  |
| H  | -2.15254700 | 3.45729000  | 2.76465900  |
| H  | -2.00757500 | 2.30812200  | -1.27063300 |
| Mn | -2.98273400 | -0.86313200 | -0.26495200 |
| O  | -3.45336900 | -1.33775700 | 1.15907700  |
| O  | -1.31062000 | -0.09568900 | -0.06565600 |
| O  | -3.96915400 | 0.44221800  | -0.96140900 |
| O  | -2.51189500 | -1.97535000 | -1.36550600 |
| Ca | -0.27674900 | -1.40525700 | -1.84002400 |
| H  | 1.60048900  | -3.00153300 | 2.95998300  |
| C  | 1.13881600  | -3.53076200 | 2.11912500  |
| H  | 0.38629500  | -4.22166700 | 2.52727300  |
| H  | 1.88224800  | -4.10508100 | 1.55964400  |
| C  | 0.44302500  | -2.56842200 | 1.21106100  |

|   |             |             |             |
|---|-------------|-------------|-------------|
| O | 0.41413000  | -2.69912700 | -0.01384400 |
| O | -0.16155300 | -1.57467000 | 1.82166800  |
| H | -0.63474100 | -1.00185500 | 1.14736700  |
| C | 3.19304600  | 0.08865800  | 0.69118500  |
| S | 2.78405400  | 0.64042900  | -1.06242700 |
| F | 3.23292800  | -1.24620500 | 0.76362700  |
| F | 2.26910100  | 0.53288400  | 1.54832000  |
| F | 4.38233400  | 0.57222200  | 1.05529400  |
| O | 1.45622900  | -0.01957600 | -1.29333000 |
| O | 2.69945200  | 2.11137600  | -0.96811300 |
| O | 3.87610600  | 0.08381800  | -1.88719100 |

TS3

|    |             |             |             |
|----|-------------|-------------|-------------|
| C  | -1.81907300 | 2.10737400  | 0.91958700  |
| C  | -0.87350100 | 1.41185900  | -0.04798400 |
| C  | -0.11618900 | 2.41076400  | -0.91569500 |
| C  | 0.66897500  | 3.39030200  | -0.03530800 |
| C  | -0.24552100 | 4.09795400  | 0.96881800  |
| C  | -1.03363100 | 3.08433400  | 1.80454400  |
| H  | 0.55622300  | 1.87325100  | -1.59195900 |
| H  | -0.16487900 | 0.79021600  | 0.50992300  |
| H  | -2.41646400 | 0.96893100  | -1.53485100 |
| H  | -2.58324600 | 2.65278200  | 0.34464600  |
| H  | -2.34092300 | 1.36630000  | 1.53455900  |
| H  | 1.45194700  | 2.83549700  | 0.50335500  |
| H  | 1.18477900  | 4.11919700  | -0.67536000 |
| H  | 0.34470400  | 4.75309200  | 1.62536800  |
| H  | -0.95232200 | 4.74546500  | 0.42411000  |
| H  | -0.33505500 | 2.51213500  | 2.43689700  |
| H  | -1.72714600 | 3.59635800  | 2.48548200  |
| H  | -0.84601900 | 2.96305400  | -1.52897600 |
| Mn | -3.19147700 | -0.55233600 | -0.62275000 |
| O  | -3.55972400 | -0.58274400 | 0.95578700  |
| O  | -1.56169200 | 0.49058700  | -0.95676500 |
| O  | -3.73936500 | 0.67997800  | -1.63749400 |
| O  | -2.64848100 | -1.92643300 | -1.33158700 |
| Ca | -0.34069500 | -1.67028700 | -1.48144000 |
| H  | 0.97934200  | -1.32092500 | 3.37976500  |
| C  | 0.46309000  | -2.22448700 | 3.02324800  |
| H  | 0.01142300  | -2.72232300 | 3.88750200  |
| H  | 1.19625000  | -2.86862500 | 2.53070500  |
| C  | -0.58610100 | -1.79764200 | 2.04347100  |
| O  | -0.37365800 | -1.71853300 | 0.83290300  |
| O  | -1.73698400 | -1.48524100 | 2.58482000  |
| H  | -2.42475000 | -1.16723900 | 1.91333500  |
| C  | 3.18065500  | -0.36558900 | 0.67022900  |
| S  | 3.00921400  | -0.08807000 | -1.18403100 |
| F  | 2.99872400  | -1.65577800 | 0.96228600  |
| F  | 2.27607500  | 0.35695800  | 1.33850100  |
| F  | 4.40037400  | -0.00327500 | 1.07381300  |

|   |            |             |             |
|---|------------|-------------|-------------|
| O | 1.56318300 | -0.42639600 | -1.41831000 |
| O | 3.30943000 | 1.34379300  | -1.37490600 |
| O | 3.94863400 | -1.05554500 | -1.78686200 |

**MnO<sub>4</sub><sup>-</sup>/(CaOTf)<sup>+</sup>/3AcOH**

INT1

|    |             |             |             |
|----|-------------|-------------|-------------|
| C  | 2.39425300  | -1.95284800 | -3.08507500 |
| C  | 1.36016800  | -1.64171200 | -1.99798200 |
| C  | 1.56255600  | -2.51409500 | -0.75671800 |
| C  | 2.99490100  | -2.41757500 | -0.22252700 |
| C  | 4.02642600  | -2.73133400 | -1.31219700 |
| C  | 3.82425700  | -1.83925400 | -2.54317000 |
| H  | 0.85591900  | -2.21226600 | 0.02312800  |
| H  | 1.44870400  | -0.58671300 | -1.70115800 |
| H  | 0.34398300  | -1.78120300 | -2.39350300 |
| H  | 2.23090200  | -2.97806600 | -3.45826300 |
| H  | 2.25590600  | -1.28022600 | -3.94462000 |
| H  | 3.15974200  | -1.39578000 | 0.15042100  |
| H  | 3.12416500  | -3.09342800 | 0.63606300  |
| H  | 5.04667500  | -2.61193800 | -0.91757200 |
| H  | 3.92673800  | -3.78795300 | -1.61378600 |
| H  | 4.01791100  | -0.79105100 | -2.26160900 |
| H  | 4.55198400  | -2.09785600 | -3.32716300 |
| H  | 1.33423000  | -3.56396000 | -1.00678800 |
| Mn | -2.26545100 | -2.08580500 | -0.43793300 |
| O  | -3.79270600 | -1.74130900 | -0.13051100 |
| O  | -1.38525700 | -0.73076400 | -0.34180300 |
| O  | -2.13055000 | -2.67196100 | -1.88863900 |
| O  | -1.73159000 | -3.14180000 | 0.62543500  |
| Ca | -1.01654500 | 1.04250700  | 1.31141200  |
| H  | -0.65624800 | 4.11247400  | -2.42014600 |
| C  | -0.75538500 | 3.15423500  | -2.93535900 |
| H  | 0.11876600  | 2.96688800  | -3.57202700 |
| H  | -1.63923700 | 3.16614200  | -3.58765000 |
| C  | -0.89898700 | 2.04682900  | -1.94134100 |
| O  | -0.98292500 | 2.22871800  | -0.72926000 |
| O  | -0.93907500 | 0.84289700  | -2.47693500 |
| H  | -1.05736000 | 0.16314500  | -1.76438200 |
| C  | -4.54023700 | 3.01600700  | -0.20053700 |
| H  | -4.37760900 | 3.64201300  | 0.68185000  |
| H  | -5.57540400 | 3.08189800  | -0.55078700 |
| H  | -3.87963000 | 3.37276900  | -1.00515100 |
| C  | -4.15823400 | 1.60152400  | 0.10170400  |
| O  | -3.30603300 | 1.29160500  | 0.93024900  |
| O  | -4.78835400 | 0.69925600  | -0.61989900 |
| H  | -4.44547500 | -0.21133300 | -0.41571300 |
| C  | 1.25572800  | -1.33985400 | 3.98955700  |
| H  | 0.90057900  | -0.67458500 | 4.78354900  |
| H  | 2.03623600  | -0.80576200 | 3.42670000  |
| H  | 1.68085100  | -2.25873100 | 4.40368400  |

|   |             |             |             |
|---|-------------|-------------|-------------|
| C | 0.13796100  | -1.62968300 | 3.04058500  |
| O | -0.70534800 | -0.79788600 | 2.71192400  |
| O | 0.13325300  | -2.85199100 | 2.55236100  |
| H | -0.58641400 | -2.95328700 | 1.87742600  |
| C | 2.86160000  | 2.28402100  | -0.15883100 |
| S | 2.02196500  | 1.49089600  | 1.32929000  |
| F | 1.96909000  | 2.58224400  | -1.10259200 |
| F | 3.75755700  | 1.43601700  | -0.66496600 |
| F | 3.48370800  | 3.40199600  | 0.21645500  |
| O | 1.27252800  | 0.32804900  | 0.75140100  |
| O | 3.13516500  | 1.16406800  | 2.23528500  |
| O | 1.03546300  | 2.50857000  | 1.81792000  |

TS1

|    |             |             |             |
|----|-------------|-------------|-------------|
| C  | -1.62013300 | 2.24093200  | -2.93292300 |
| C  | -1.09112400 | 1.98201000  | -1.54237000 |
| C  | -1.81543600 | 2.72336700  | -0.44467500 |
| C  | -3.30981400 | 2.33084200  | -0.48376000 |
| C  | -3.90817500 | 2.56534500  | -1.87370800 |
| C  | -3.11458700 | 1.83720500  | -2.96255300 |
| H  | -1.38757700 | 2.47934900  | 0.53398500  |
| H  | -1.00738700 | 0.91687400  | -1.31343300 |
| H  | 0.05864700  | 2.40212900  | -1.51495000 |
| H  | -1.52961200 | 3.30830500  | -3.18603500 |
| H  | -1.05754600 | 1.66856400  | -3.68220600 |
| H  | -3.39817800 | 1.26806300  | -0.21633100 |
| H  | -3.85407600 | 2.90464100  | 0.28009800  |
| H  | -4.95709000 | 2.23330700  | -1.89105400 |
| H  | -3.91456100 | 3.64608600  | -2.09079300 |
| H  | -3.19174900 | 0.74959200  | -2.80640900 |
| H  | -3.52647900 | 2.05180700  | -3.95934400 |
| H  | -1.72079300 | 3.80985800  | -0.59427100 |
| Mn | 2.15773400  | 2.11139900  | -0.20529500 |
| O  | 3.61160400  | 1.74433700  | -0.75791400 |
| O  | 1.25957000  | 0.73163300  | -0.15242400 |
| O  | 1.28866300  | 2.99394800  | -1.30810300 |
| O  | 2.13343800  | 2.82981500  | 1.21884700  |
| Ca | 1.02857600  | -1.11109000 | 1.28158500  |
| H  | 0.73099700  | -3.85219200 | -2.74562800 |
| C  | 0.83926400  | -2.83831300 | -3.13817900 |
| H  | -0.00625800 | -2.58300700 | -3.78901300 |
| H  | 1.75302000  | -2.76744300 | -3.74448300 |
| C  | 0.92977800  | -1.85524600 | -2.01485900 |
| O  | 1.01683700  | -2.18612200 | -0.83265800 |
| O  | 0.92313300  | -0.59511000 | -2.39165100 |
| H  | 1.02616400  | -0.00293500 | -1.58709700 |
| C  | 4.52424600  | -3.03515300 | -0.32733100 |
| H  | 4.54392900  | -3.59209700 | 0.61400600  |
| H  | 5.50217600  | -3.05145600 | -0.81973900 |
| H  | 3.79275100  | -3.50953900 | -0.99892600 |



|   |             |             |             |
|---|-------------|-------------|-------------|
| C | 4.06405400  | -1.63198400 | -0.08132400 |
| O | 3.33871400  | -1.31432700 | 0.85837700  |
| O | 4.47758100  | -0.76704800 | -0.98281200 |
| H | 4.12272000  | 0.15180400  | -0.82716800 |
| C | -1.38090000 | 1.14440700  | 4.07064600  |
| H | -1.18782700 | 0.38952800  | 4.83978700  |
| H | -2.16193700 | 0.75103400  | 3.40286700  |
| H | -1.73025900 | 2.08168800  | 4.51394400  |
| C | -0.14980900 | 1.35158700  | 3.24741800  |
| O | 0.63410900  | 0.44358700  | 2.97135800  |
| O | 0.02120300  | 2.57941100  | 2.81322800  |
| H | 0.82683100  | 2.64907700  | 2.22554900  |
| C | -2.83979500 | -2.26056500 | -0.27513600 |
| S | -2.03364300 | -1.53550200 | 1.26591000  |
| F | -1.93023000 | -2.48800600 | -1.22251300 |
| F | -3.74543500 | -1.40158100 | -0.74685900 |
| F | -3.44596000 | -3.40913100 | 0.02699000  |
| O | -1.30738300 | -0.32646600 | 0.76125500  |
| O | -3.16281700 | -1.28953500 | 2.17798900  |
| O | -1.03131400 | -2.56116300 | 1.70409800  |

### INT3

|    |             |             |             |
|----|-------------|-------------|-------------|
| C  | -0.52543600 | 2.57250800  | -2.08939000 |
| C  | -0.52463900 | 1.77035600  | -0.79201400 |
| C  | -1.03994200 | 2.59187600  | 0.38205900  |
| C  | -2.46180900 | 3.08389400  | 0.08738000  |
| C  | -2.52469500 | 3.86766600  | -1.22795700 |
| C  | -1.95273600 | 3.05123300  | -2.39197100 |
| H  | -1.03159900 | 1.98200500  | 1.29035100  |
| H  | -1.20908000 | 0.92390500  | -0.93287800 |
| H  | 1.97962500  | 3.56349400  | -1.41865900 |
| H  | 0.12694300  | 3.45109200  | -1.98980600 |
| H  | -0.14174200 | 1.96011000  | -2.91464100 |
| H  | -3.13200200 | 2.21191600  | 0.02859600  |
| H  | -2.81745800 | 3.70216300  | 0.92304400  |
| H  | -3.56122200 | 4.16267600  | -1.44492200 |
| H  | -1.94431200 | 4.79902900  | -1.12237500 |
| H  | -2.59368900 | 2.17344500  | -2.57373000 |
| H  | -1.95489000 | 3.64242400  | -3.31777300 |
| H  | -0.37251900 | 3.44991300  | 0.54593700  |
| Mn | 2.17880100  | 1.97341500  | 0.29164100  |
| O  | 3.41760100  | 1.04802200  | -0.16593300 |
| O  | 0.75486400  | 1.13706100  | -0.51883100 |
| O  | 2.22420000  | 3.56695700  | -0.48162900 |
| O  | 1.87201700  | 2.09386400  | 1.86066600  |
| Ca | 0.44839200  | -1.11483800 | 0.60428900  |
| H  | 1.47545100  | -3.17411800 | -3.69720000 |
| C  | 1.65884400  | -2.11242100 | -3.87905700 |
| H  | 1.02883200  | -1.75524500 | -4.70514800 |
| H  | 2.70441900  | -1.94890700 | -4.17169400 |

|   |             |             |             |
|---|-------------|-------------|-------------|
| C | 1.35609500  | -1.31546400 | -2.65057000 |
| O | 0.92490000  | -1.81192900 | -1.61038900 |
| O | 1.58828200  | -0.02571300 | -2.76821900 |
| H | 1.33540600  | 0.45013700  | -1.92374200 |
| C | 4.09571000  | -3.70838900 | 0.10022600  |
| H | 3.72859100  | -4.34693200 | 0.90879700  |
| H | 5.19005700  | -3.71347400 | 0.05524900  |
| H | 3.71464600  | -4.09750800 | -0.85632100 |
| C | 3.57009500  | -2.31631600 | 0.26487300  |
| O | 2.54603700  | -2.05875300 | 0.89936200  |
| O | 4.27171800  | -1.39484200 | -0.34946800 |
| H | 3.88100700  | -0.47239200 | -0.23648100 |
| C | -1.23121700 | -0.31688000 | 4.60884000  |
| H | -1.01812100 | -1.32709100 | 4.97306200  |
| H | -2.17833000 | -0.35019700 | 4.04918000  |
| H | -1.33355800 | 0.39052400  | 5.43708500  |
| C | -0.16748400 | 0.10839300  | 3.64738800  |
| O | 0.38583200  | -0.67769900 | 2.87744400  |
| O | 0.11090200  | 1.39022400  | 3.65782500  |
| H | 0.79359400  | 1.62319100  | 2.95693200  |
| C | -3.32334300 | -1.42935800 | -1.05669400 |
| S | -2.56707900 | -1.70016100 | 0.64565400  |
| F | -2.36711800 | -1.08241000 | -1.92230800 |
| F | -4.23008400 | -0.45346100 | -1.00047300 |
| F | -3.91023400 | -2.54604600 | -1.48401300 |
| O | -1.93998100 | -0.37422600 | 0.95935600  |
| O | -3.68282300 | -2.12482100 | 1.50162500  |
| O | -1.47909500 | -2.70333600 | 0.39723200  |

### TS3

|    |             |            |             |
|----|-------------|------------|-------------|
| C  | -2.18712700 | 3.15847500 | -0.54477300 |
| C  | -1.64522300 | 1.97883300 | 0.25566600  |
| C  | -2.49640400 | 1.67375300 | 1.47660500  |
| C  | -3.94425500 | 1.40014400 | 1.05123100  |
| C  | -4.52266100 | 2.55949900 | 0.23356300  |
| C  | -3.63459200 | 2.88204200 | -0.97232800 |
| H  | -2.08377200 | 0.80693000 | 2.00432600  |
| H  | -1.58860000 | 1.08778600 | -0.37742500 |
| H  | 0.07372100  | 3.13296200 | 1.27366400  |
| H  | -2.14705700 | 4.06185100 | 0.08365500  |
| H  | -1.55224500 | 3.33825200 | -1.42195500 |
| H  | -3.96875800 | 0.47908600 | 0.44802400  |
| H  | -4.55722800 | 1.21022900 | 1.94282300  |
| H  | -5.54174000 | 2.31733600 | -0.10007100 |
| H  | -4.60104800 | 3.45255700 | 0.87518000  |
| H  | -3.64516900 | 2.03066300 | -1.67174600 |
| H  | -4.02459100 | 3.74982900 | -1.52197900 |
| H  | -2.45984700 | 2.53230700 | 2.16543000  |
| Mn | 0.83698500  | 1.48569800 | 1.99516900  |
| O  | 2.04873600  | 0.75042800 | 1.13704700  |

|    |             |             |             |
|----|-------------|-------------|-------------|
| O  | -0.25756900 | 2.27184100  | 0.59593700  |
| O  | 0.96169800  | 3.14180200  | 2.28328900  |
| O  | 0.06258000  | 0.62353800  | 3.10341100  |
| Ca | 1.50329600  | -1.23291500 | -0.05931200 |
| H  | 2.26131100  | 0.67478100  | -4.15575900 |
| C  | 2.19480800  | 1.61569400  | -3.60374500 |
| H  | 1.67699100  | 2.38185900  | -4.19245900 |
| H  | 3.20919600  | 1.98589600  | -3.39457600 |
| C  | 1.49786300  | 1.39799800  | -2.29747500 |
| O  | 1.31550500  | 0.28821800  | -1.80732200 |
| O  | 1.11179000  | 2.50637500  | -1.70224600 |
| H  | 0.66029000  | 2.32857000  | -0.83269900 |
| C  | 5.87737600  | -0.03997100 | -1.36399100 |
| H  | 6.10609500  | -1.05518100 | -1.69849300 |
| H  | 6.68447900  | 0.35397500  | -0.73377000 |
| H  | 5.78717800  | 0.62398900  | -2.23589500 |
| C  | 4.58114200  | -0.01896000 | -0.61477000 |
| O  | 3.81443000  | -0.98255700 | -0.56908700 |
| O  | 4.31539500  | 1.12566100  | -0.02516600 |
| H  | 3.43263100  | 1.07512400  | 0.46597300  |
| C  | -0.39920400 | -4.17762100 | 2.69075200  |
| H  | 0.41659200  | -4.87908100 | 2.49148900  |
| H  | -1.15910700 | -4.29330700 | 1.90232000  |
| H  | -0.87020600 | -4.37853700 | 3.65836200  |
| C  | 0.10247000  | -2.77007800 | 2.60968100  |
| O  | 1.04598400  | -2.43841300 | 1.89011400  |
| O  | -0.56829400 | -1.91057500 | 3.33716700  |
| H  | -0.26422700 | -0.96545400 | 3.18790400  |
| C  | -2.20508300 | -1.43418900 | -2.20977200 |
| S  | -1.31567100 | -2.25954700 | -0.76867700 |
| F  | -1.48248000 | -0.41849300 | -2.68017700 |
| F  | -3.38609600 | -0.96886800 | -1.79748100 |
| F  | -2.40367500 | -2.31784500 | -3.18737500 |
| O  | -1.04115800 | -1.13440400 | 0.18147900  |
| O  | -2.24685700 | -3.29966900 | -0.30365900 |
| O  | -0.01837700 | -2.74108000 | -1.35034400 |
